# Supplementary material for: Design, Synthesis, and In Vivo Evaluation of C1-Linked 4,5-Epoxymorphinan Haptens for Heroin Vaccines
Source: MDPI journal article supplement (doi:10.3390/molecules27051553), 2022-02-25
Supplement: s1 [file s1]

## Supplementary Section

### Design, Synthesis, and *In vivo* Evaluation of C1-Linked 4,5-Epoxy-morphinan Haptens for Heroin Vaccines

Agnieszka Sulima,<sup>1</sup> Fuying Li,<sup>1</sup> J. Brian Morgan,<sup>1</sup> Phong Truong,<sup>1,a</sup> Joshua F. G. Antoline,<sup>1</sup> Therese Oertel,<sup>2,b</sup> Rodell C. Barrientos,<sup>2,3,c</sup> Oscar B. Torres,<sup>2,3,c</sup> Zoltan Beck,<sup>2,3,d</sup> Gregory H. Imler,<sup>4</sup> Jeffrey R. Deschamps,<sup>4</sup> Gary R. Matyas,<sup>2</sup> Arthur E. Jacobson<sup>1,\*</sup> and Kenner C. Rice<sup>1,\*</sup>

<sup>1</sup>Drug Design and Synthesis Section, Molecular Targets and Medications Discovery Branch, Intramural Research Program, National Institute on Drug Abuse and the National Institute on Alcohol Abuse and Alcoholism, National Institutes of Health, Department of Health and Human Services, 9800 Medical Center Drive, Bethesda, MD 20892-3373, USA.

<sup>2</sup>Laboratory of Adjuvant and Antigen Research, US Military HIV Research Program, Walter Reed Army Institute of Research, 503 Robert Grant Avenue, Silver Spring, MD 20910 USA

<sup>3</sup>U.S. Military HIV Research Program, Henry M. Jackson Foundation for the Advancement of Military Medicine, 6720A Rockledge Drive, Bethesda, MD 20817 USA.

<sup>4</sup>Center for Biomolecular Science and Engineering, Naval Research Laboratory, Washington DC 20375, United States

\*Correspondence kcr: kennerr@mail.nih.gov, Tel.: 301-451-4799; aej: arthurj@mail.nih.gov, Tel.: 301-451-5028

<sup>a</sup> Current address: Emory Institute for Drug Development, Emory University, Atlanta, GA, 3039, United States

<sup>b</sup> Current address: Department of Chemistry, Georgetown University, Washington, DC, 20057, United States

<sup>c</sup> Current address: Merck & Co., Inc., 126 E Lincoln Avenue, Rahway, NJ 07065, United States

<sup>d</sup> Current address: Pfizer, Inc., 401 N Middletown Rd, Pearl River, NY 10965, United States

## Table of Contents

|                                |    |
|--------------------------------|----|
| <sup>1</sup> H NMR of 1.....   | 4  |
| <sup>13</sup> C NMR of 1.....  | 4  |
| <sup>1</sup> H NMR of 2.....   | 5  |
| <sup>13</sup> C NMR of 2.....  | 5  |
| <sup>1</sup> H NMR of 3.....   | 6  |
| <sup>13</sup> C NMR of 3.....  | 6  |
| <sup>1</sup> H NMR of 4.....   | 7  |
| <sup>13</sup> C NMR of 4.....  | 7  |
| <sup>1</sup> H NMR of 6.....   | 8  |
| <sup>13</sup> C NMR of 6.....  | 8  |
| <sup>1</sup> H NMR of 7.....   | 9  |
| <sup>13</sup> C NMR of 7.....  | 9  |
| <sup>1</sup> H NMR of 8.....   | 10 |
| <sup>13</sup> C NMR of 8.....  | 10 |
| <sup>1</sup> H NMR of 11.....  | 11 |
| <sup>13</sup> C NMR of 11..... | 11 |
| <sup>1</sup> H NMR of 12.....  | 12 |
| <sup>13</sup> C NMR of 12..... | 12 |
| <sup>1</sup> H NMR of 15.....  | 13 |
| <sup>13</sup> C NMR of 15..... | 13 |
| <sup>1</sup> H NMR of 16.....  | 14 |
| <sup>13</sup> C NMR of 16..... | 14 |
| <sup>1</sup> H NMR of 17.....  | 15 |
| <sup>13</sup> C NMR of 17..... | 15 |
| <sup>1</sup> H NMR of 20.....  | 16 |
| <sup>13</sup> C NMR of 20..... | 17 |
| <sup>1</sup> H NMR of 21.....  | 18 |
| <sup>13</sup> C NMR of 21..... | 19 |
| <sup>1</sup> H NMR of 22.....  | 20 |
| <sup>13</sup> C NMR of 22..... | 21 |
| <sup>1</sup> H NMR of 23.....  | 22 |

|                                                          |       |
|----------------------------------------------------------|-------|
| <sup>13</sup> C NMR of 23.....                           | 23    |
| <sup>1</sup> H NMR of 25.....                            | 24    |
| <sup>13</sup> C NMR of 25.....                           | 25    |
| <sup>1</sup> H NMR of 26.....                            | 26    |
| <sup>13</sup> C NMR of 26.....                           | 26    |
| <sup>1</sup> H NMR of 29.....                            | 27    |
| <sup>13</sup> C NMR of 29.....                           | 27    |
| <sup>1</sup> H NMR of 30.....                            | 28    |
| <sup>13</sup> C NMR of 30.....                           | 28    |
| <sup>1</sup> H NMR of 31.....                            | 29    |
| <sup>13</sup> C NMR of 31.....                           | 29    |
| <sup>1</sup> H NMR of 32.....                            | 30    |
| <sup>13</sup> C NMR of 32.....                           | 30    |
| <sup>1</sup> H NMR of 34.....                            | 31    |
| <sup>13</sup> C NMR of 34.....                           | 31    |
| X-ray crystallographic data for compound <b>16</b> ..... | 32-39 |
| Structures of Naloxone and Naltrexone .....              | 40    |

## Compound 1

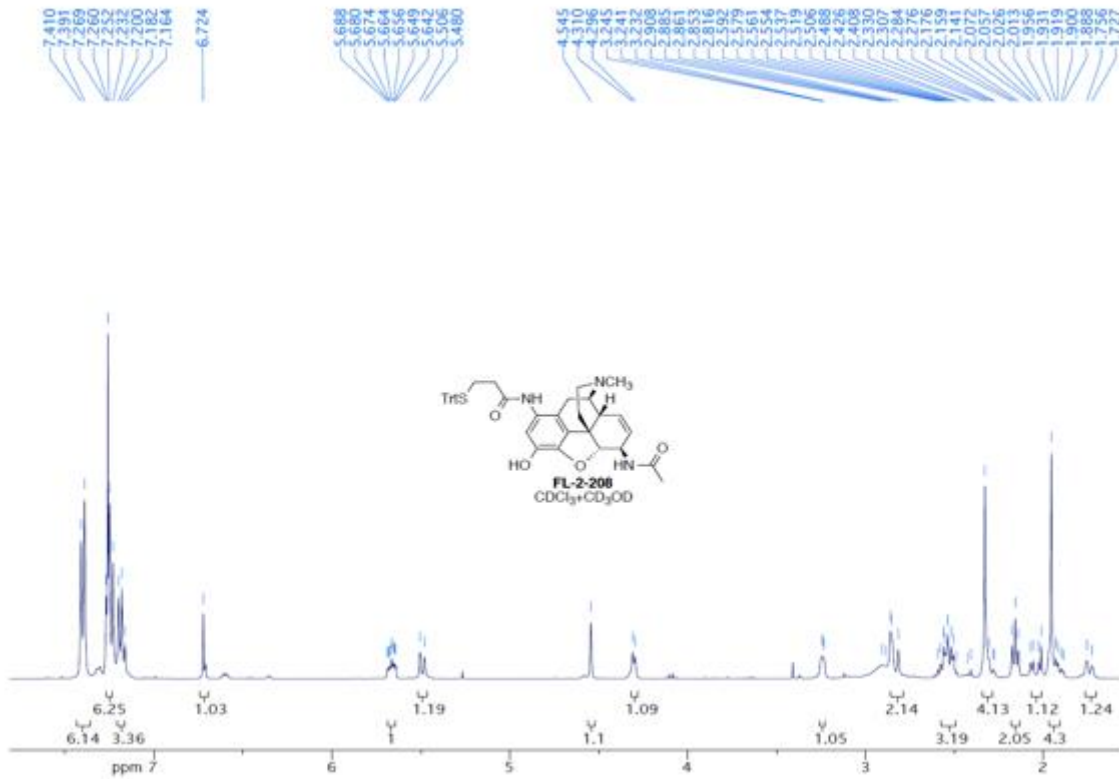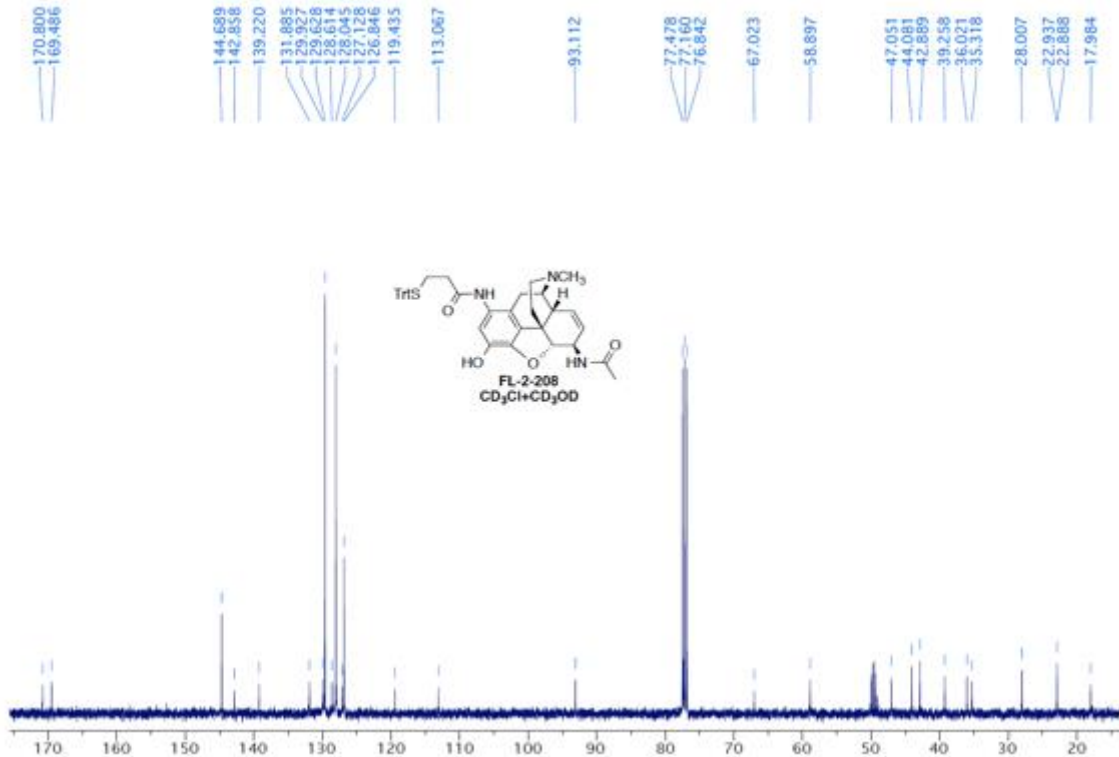

[illegible]

# Compound 3

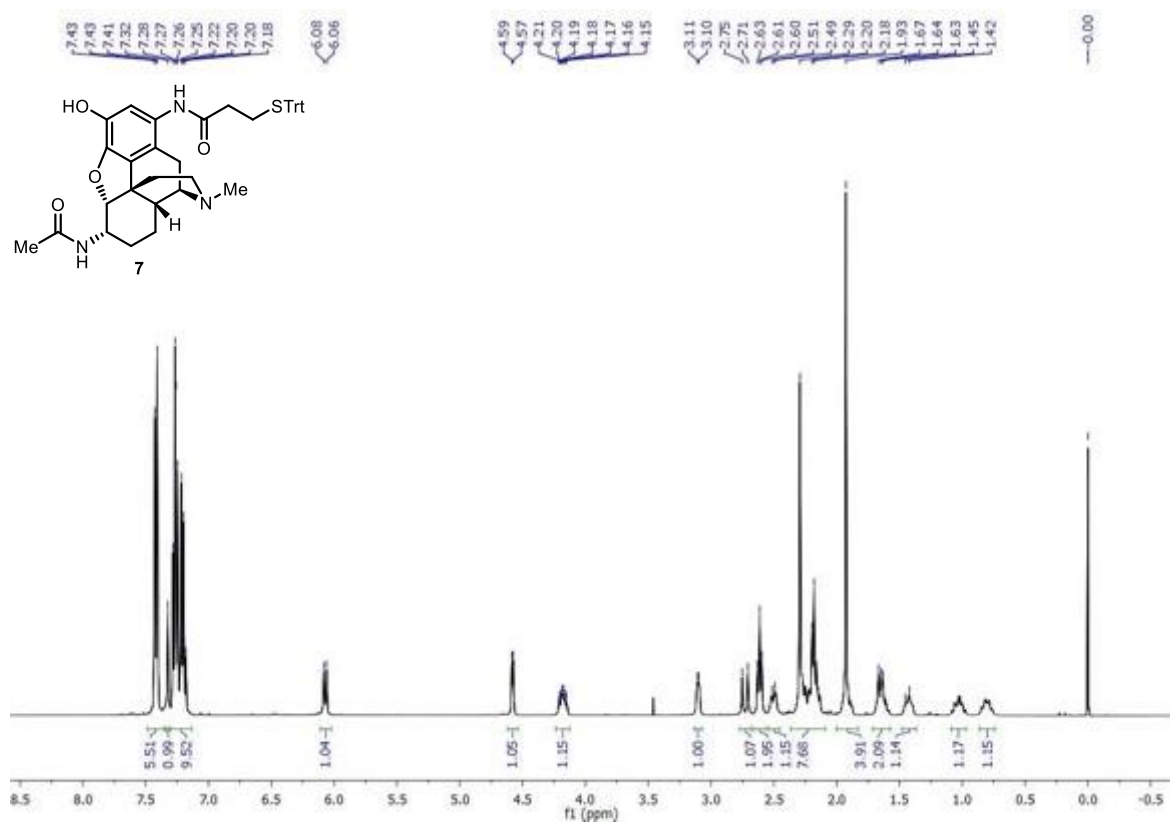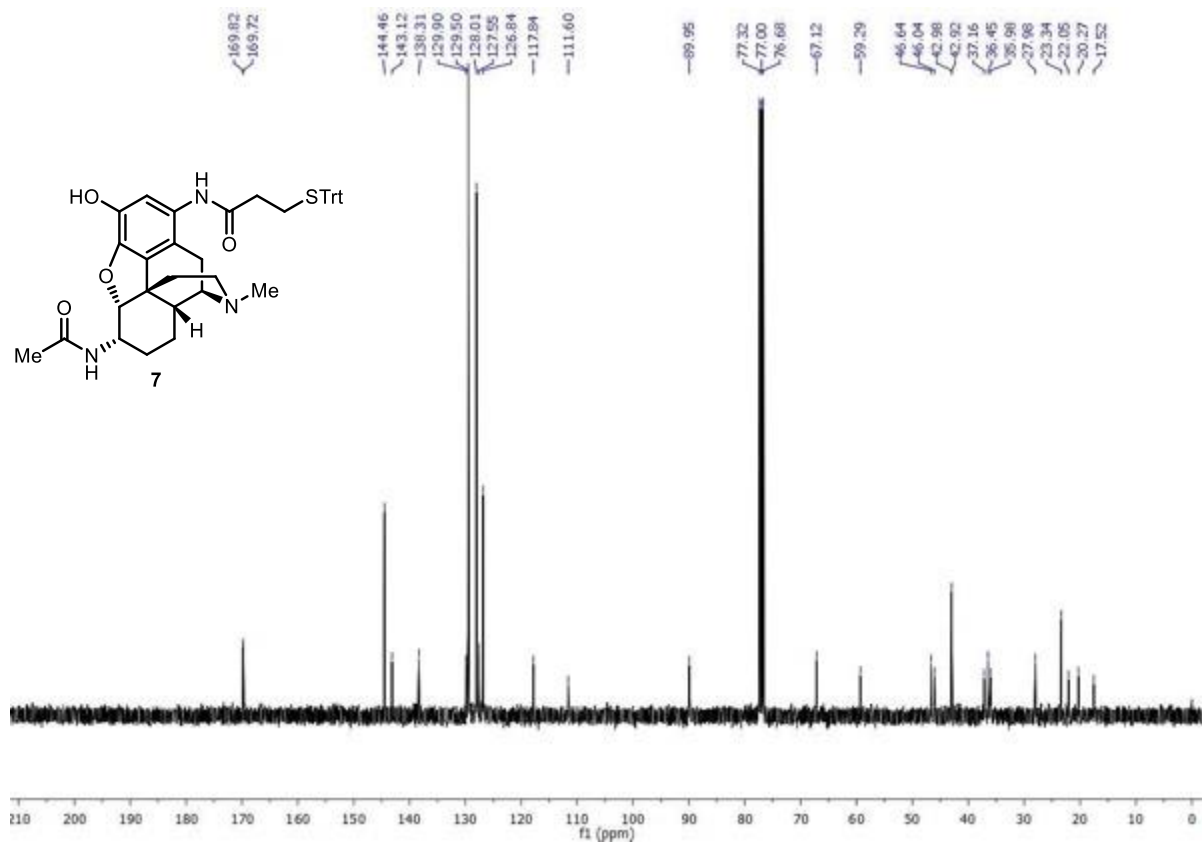

# Compound 4

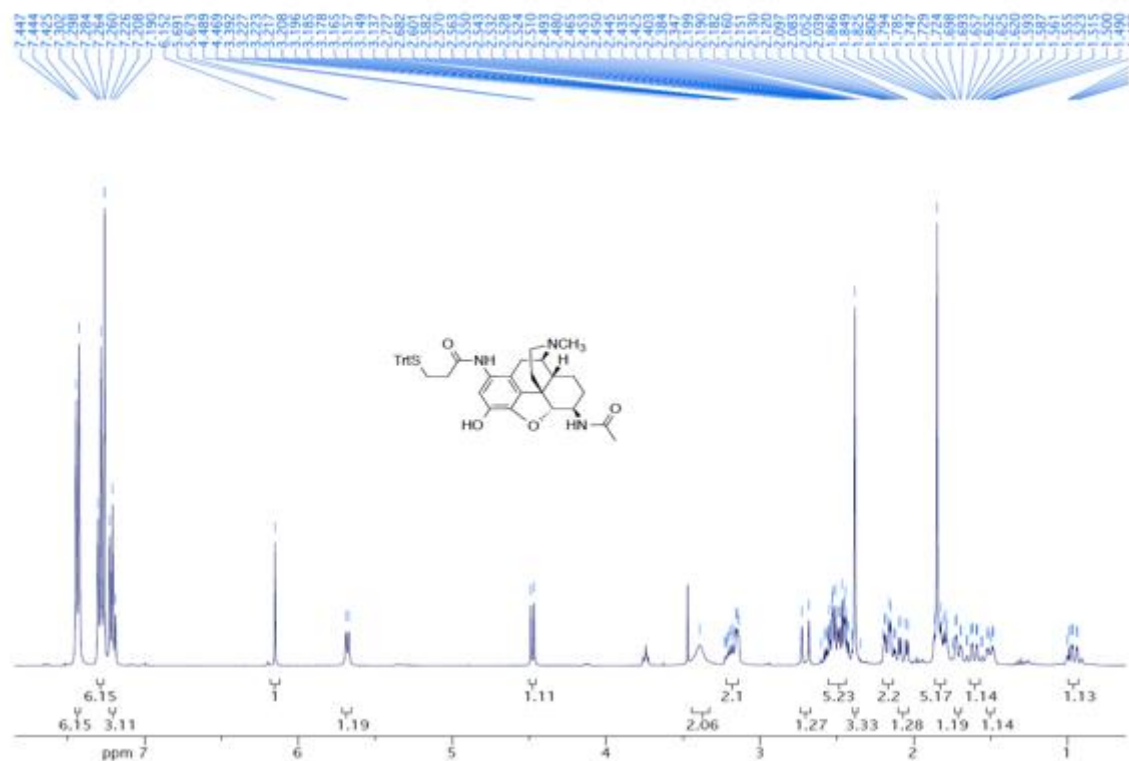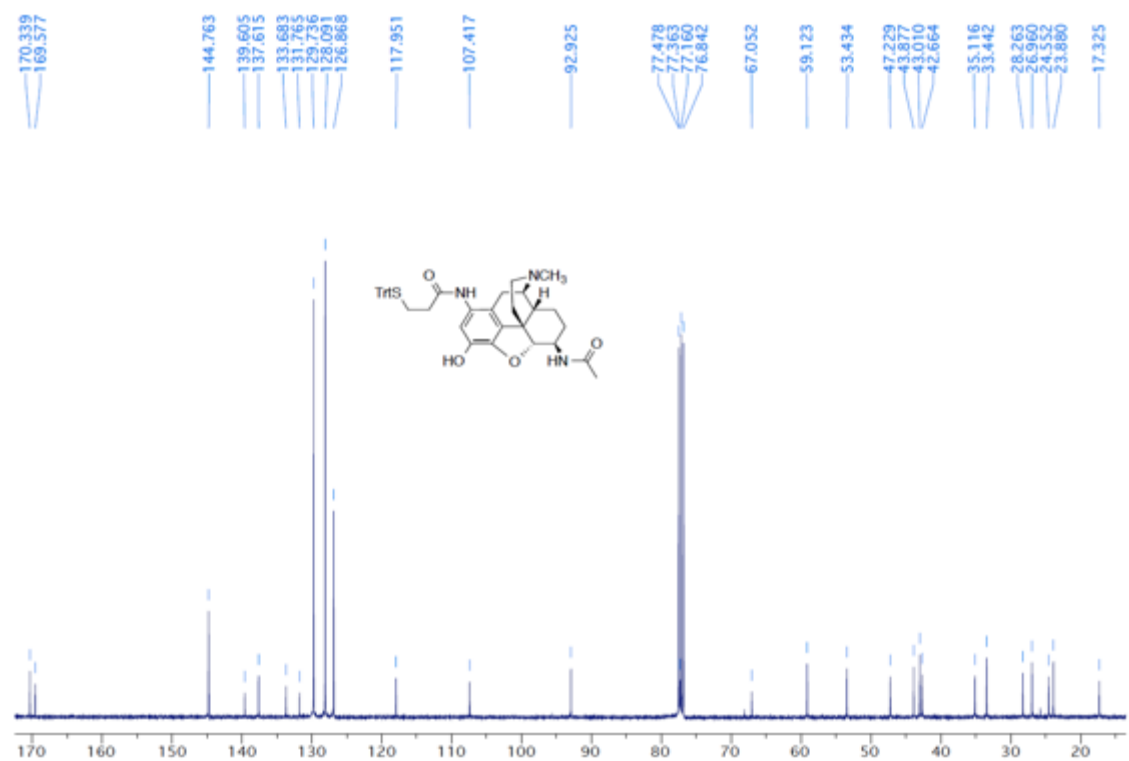

### Compound 6

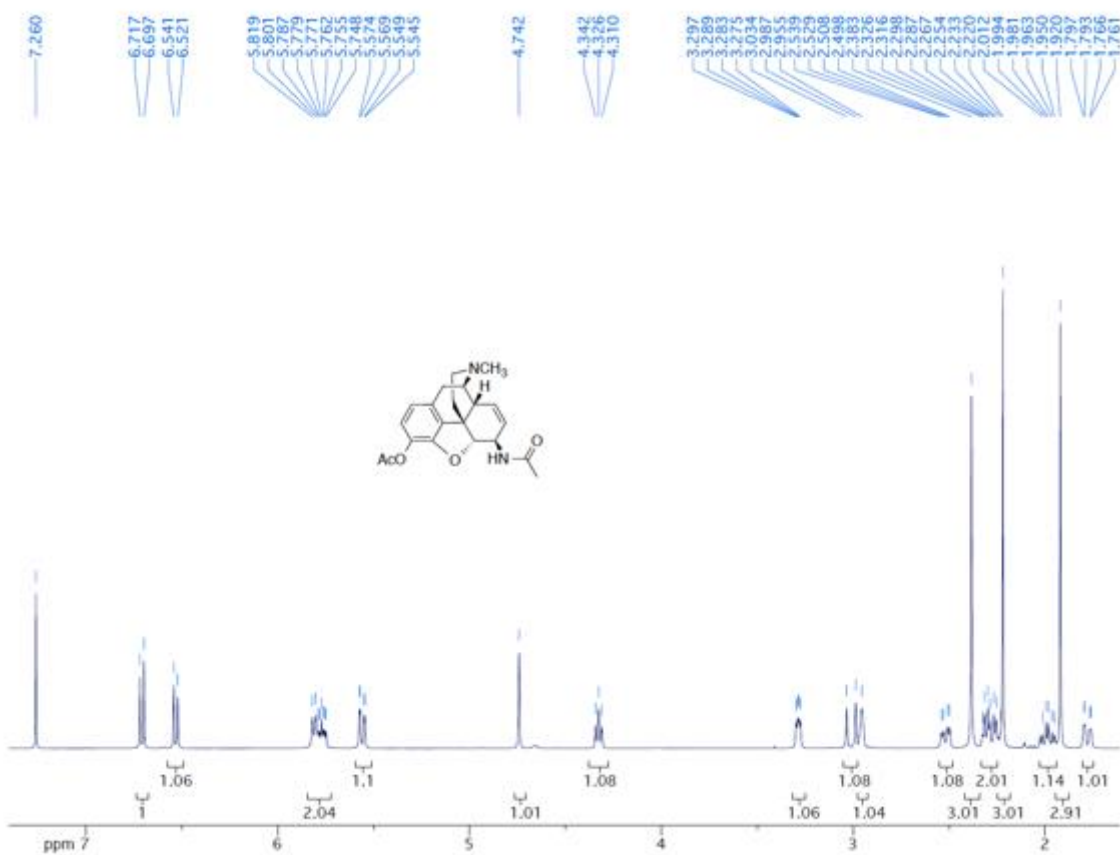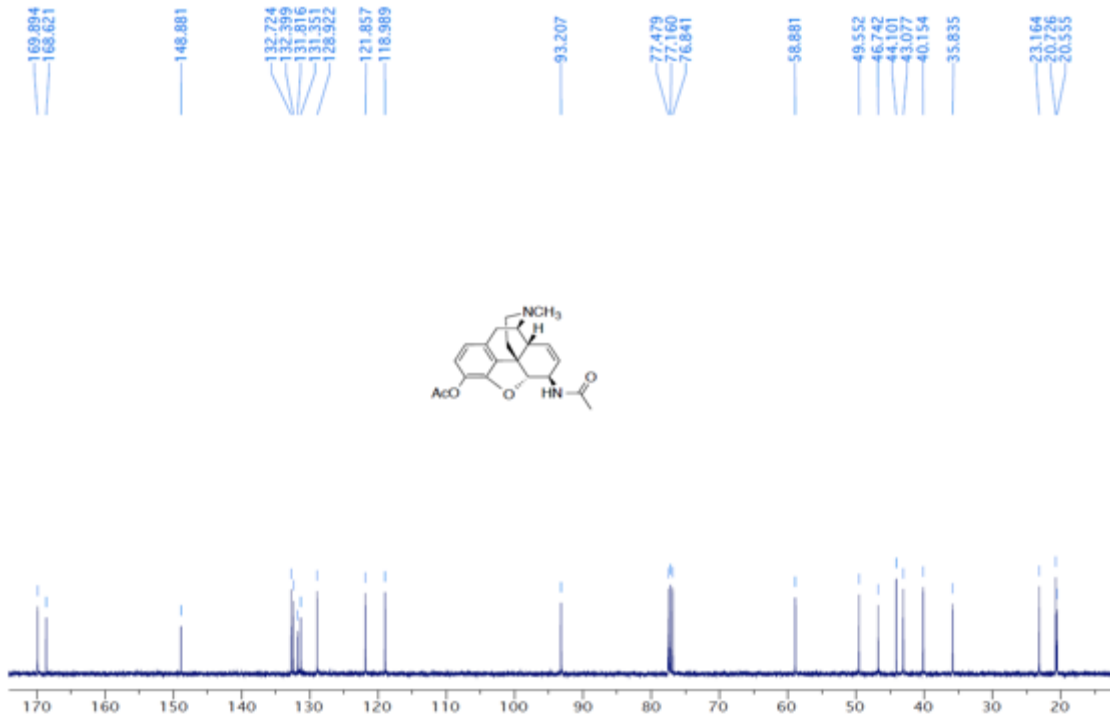



# Compound 7

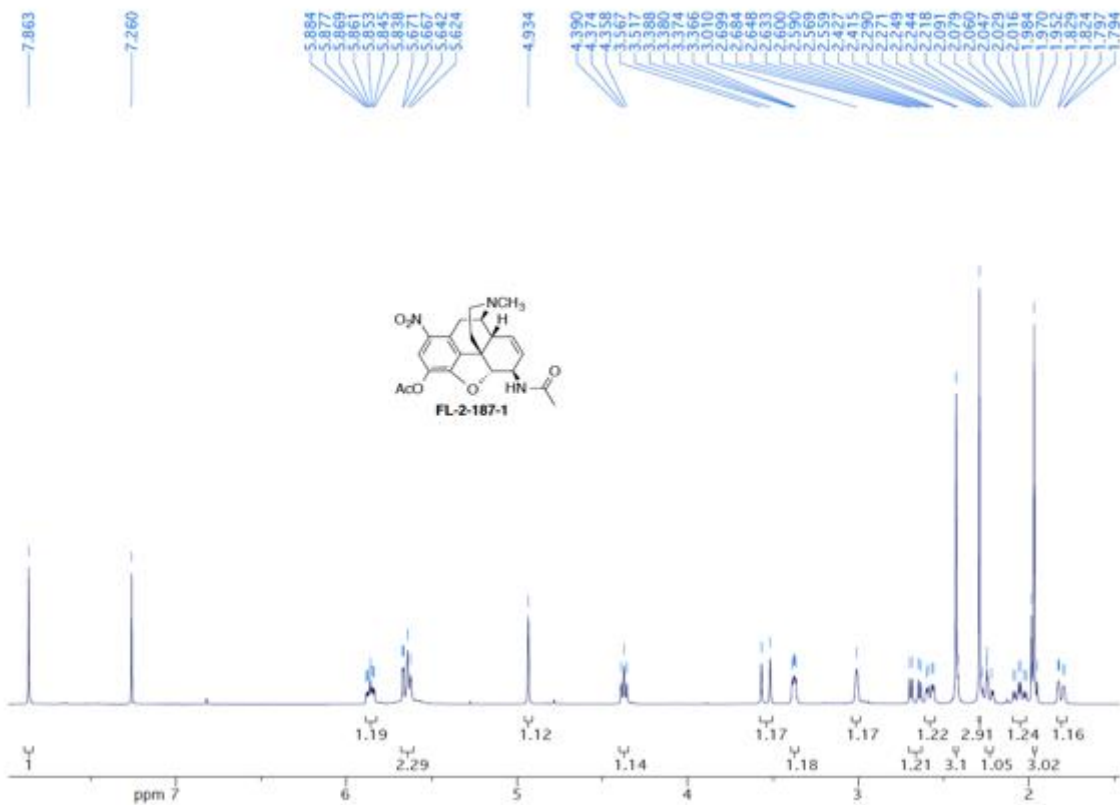

# Compound 8

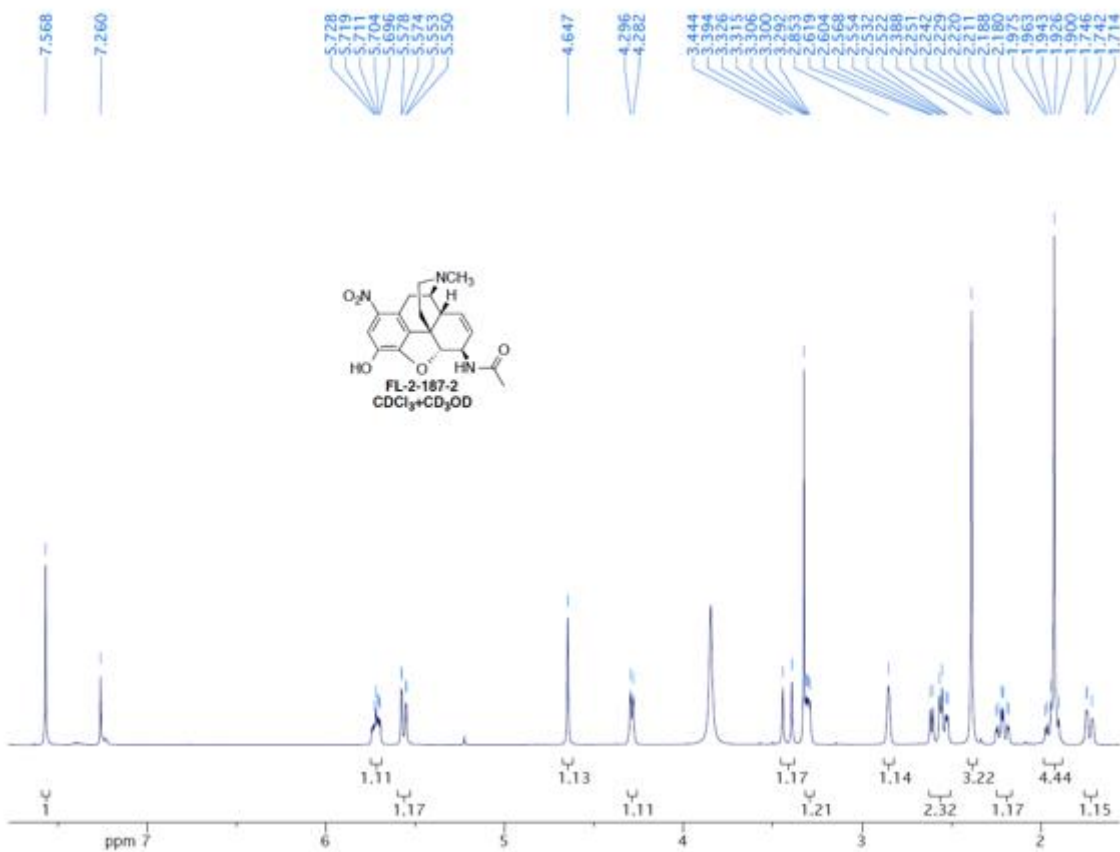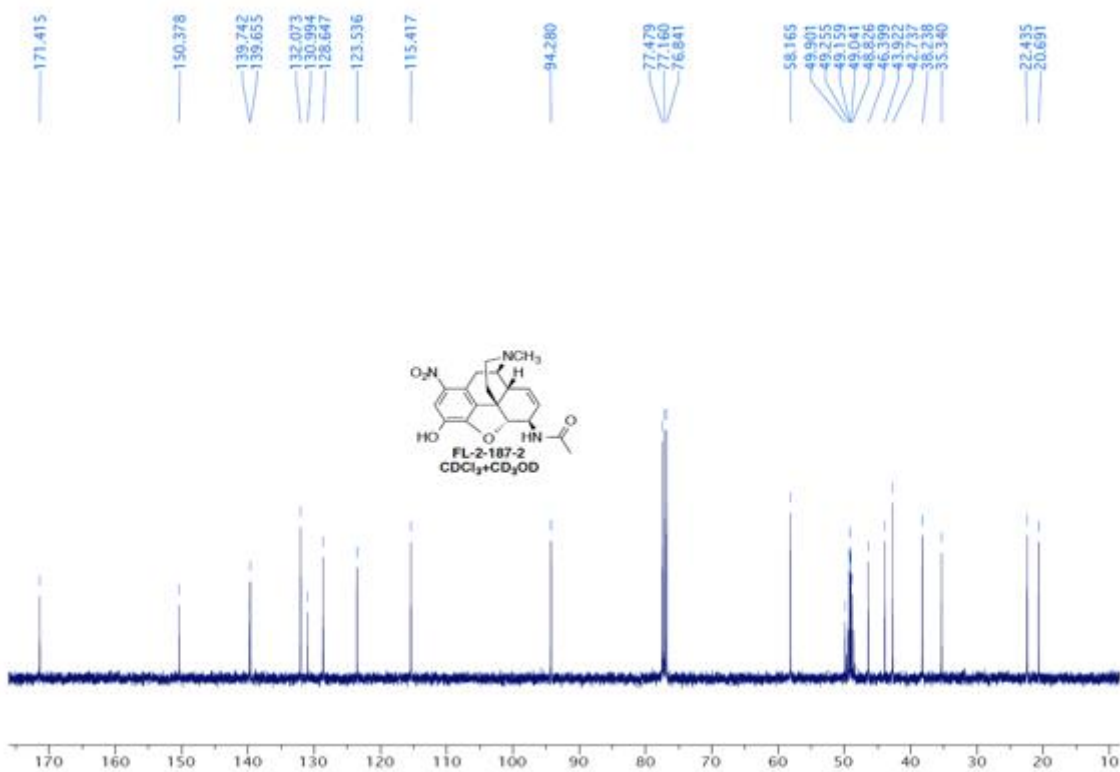

### Compound 11

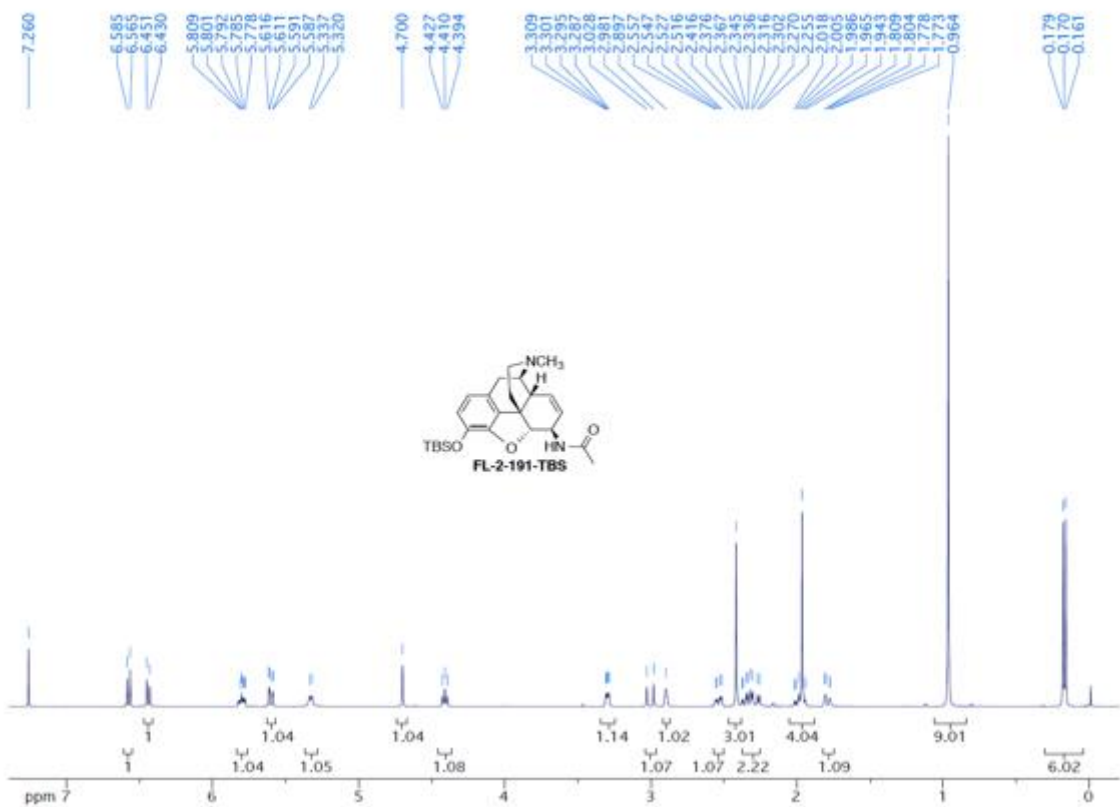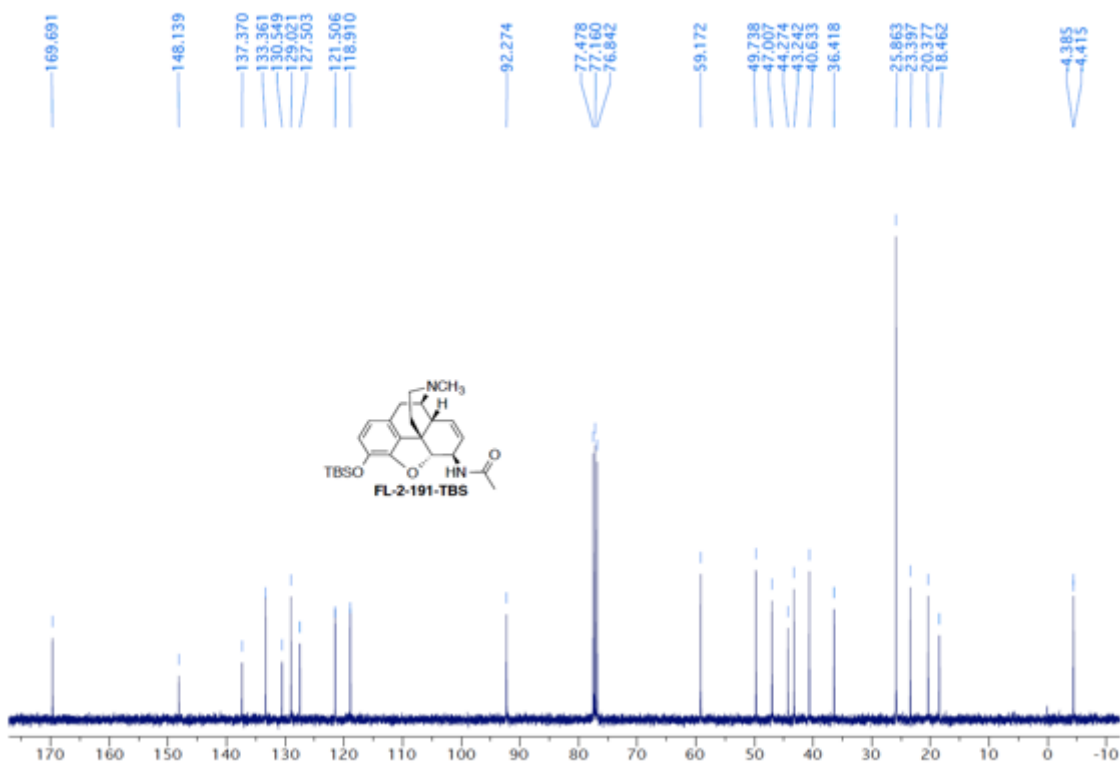

Chemical structure of compound 193 is shown above the spectrum. The structure is a complex polycyclic molecule with a TBSO group, a nitro group, and a carbamate group.

**1H NMR spectrum (CDCl<sub>3</sub>):**

- Chemical shift (ppm): 7.596, 7.260, 6.512, 6.445, 6.37, 6.29, 6.21, 6.14, 6.06, 5.97, 5.87, 5.75, 5.67, 4.856, 4.13, 4.07, 4.01, 3.93, 3.87, 3.81, 3.75, 3.69, 3.63, 3.57, 3.51, 3.45, 3.39, 3.33, 3.27, 3.21, 3.15, 3.09, 3.03, 3.08, 2.97, 2.91, 2.85, 2.79, 2.73, 2.67, 2.61, 2.55, 2.49, 2.43, 2.37, 2.31, 2.25, 2.19, 2.13, 2.07, 2.01, 1.95, 1.89, 1.83, 1.77, 1.71, 1.65, 1.59, 1.53, 1.47, 1.41, 1.35, 1.29, 1.23, 1.17, 1.11, 1.05, 0.99, 0.93, 0.87, 0.81, 0.75, 0.69, 0.63, 0.57, 0.51, 0.45, 0.39, 0.33, 0.27, 0.21, 0.15, 0.09, 0.03, 0.178, 0.12, 0.06, 0.01.
- Integration values: 1.14, 2.17, 1.08, 1.14, 1.15, 1.09, 1.08, 1.05, 1.09, 3.08, 1.11, 1.16, 9.05, 6.02.

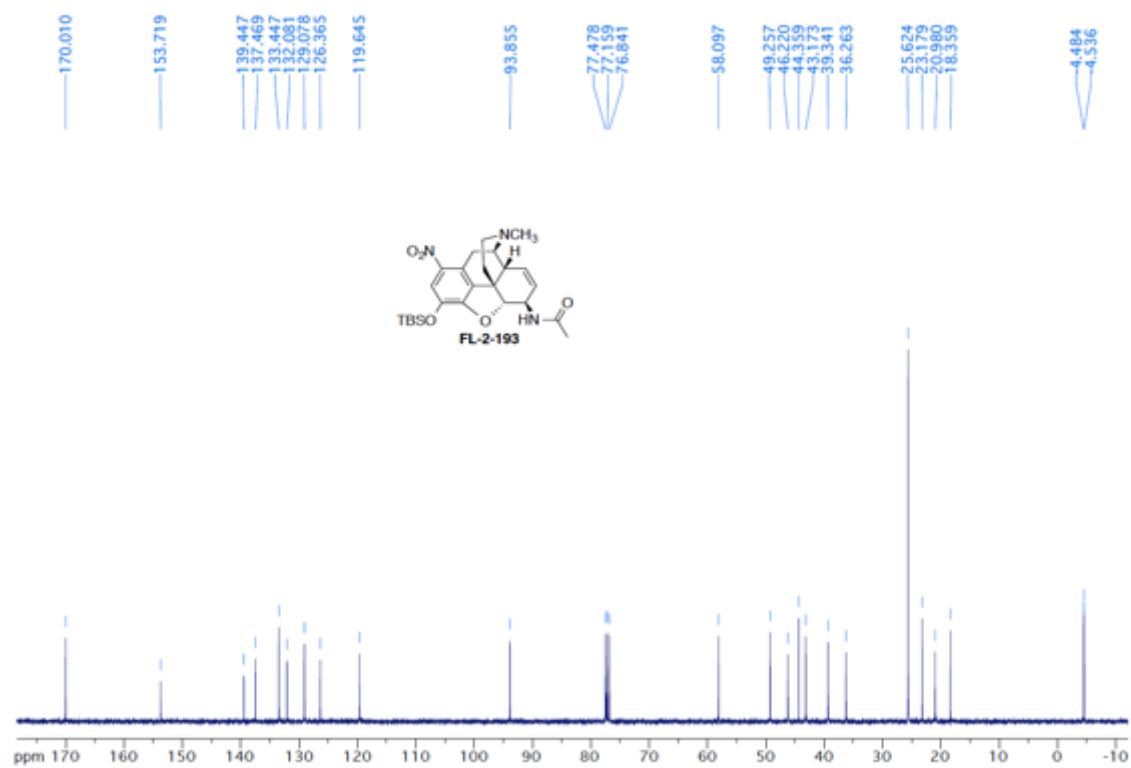

# Compound 15

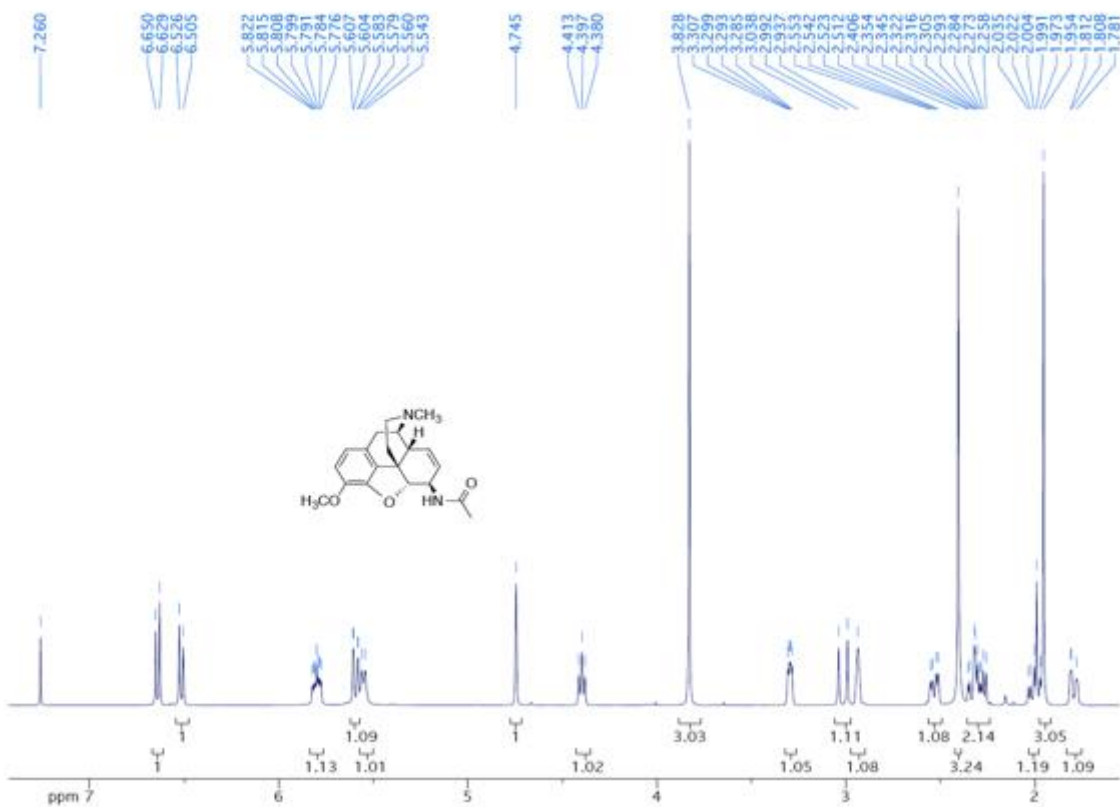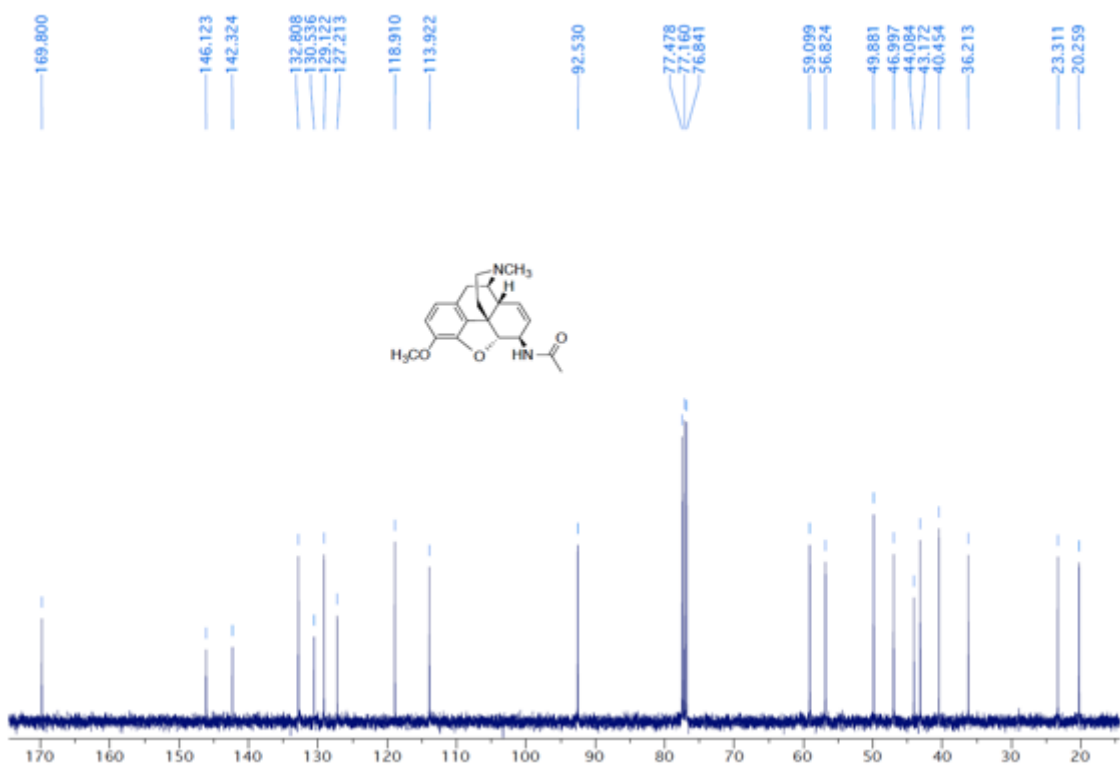

# Compound 16

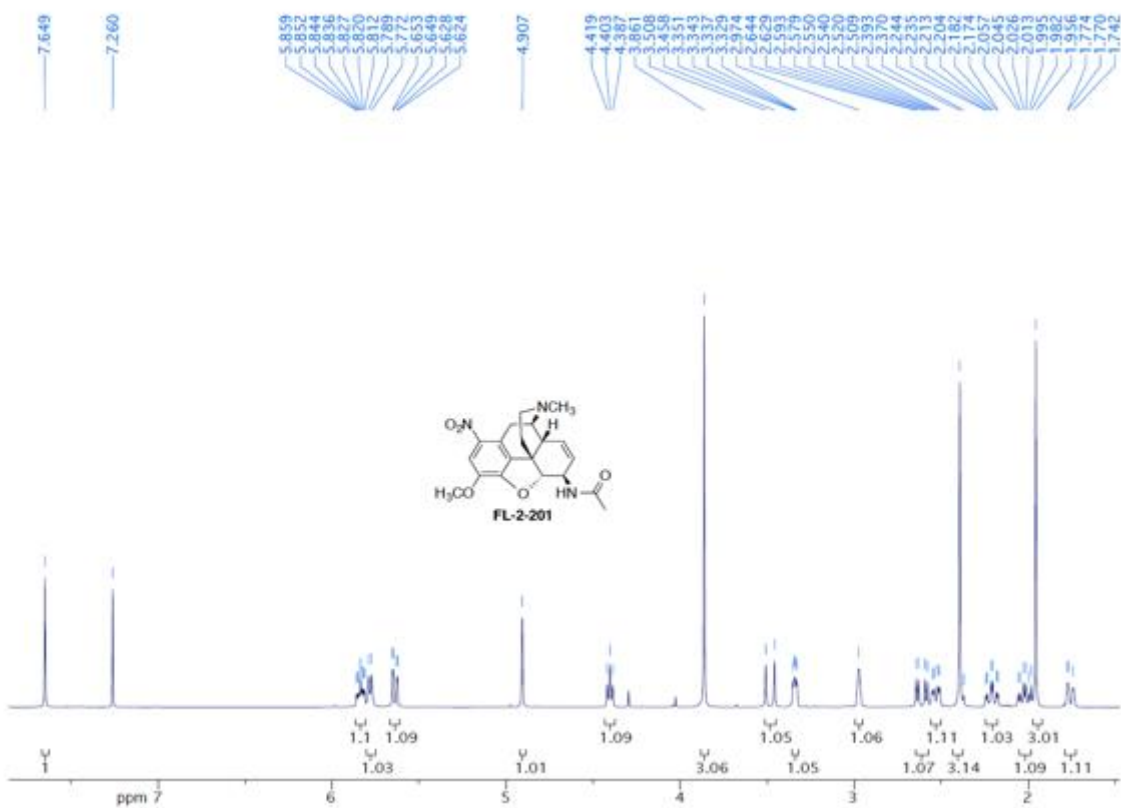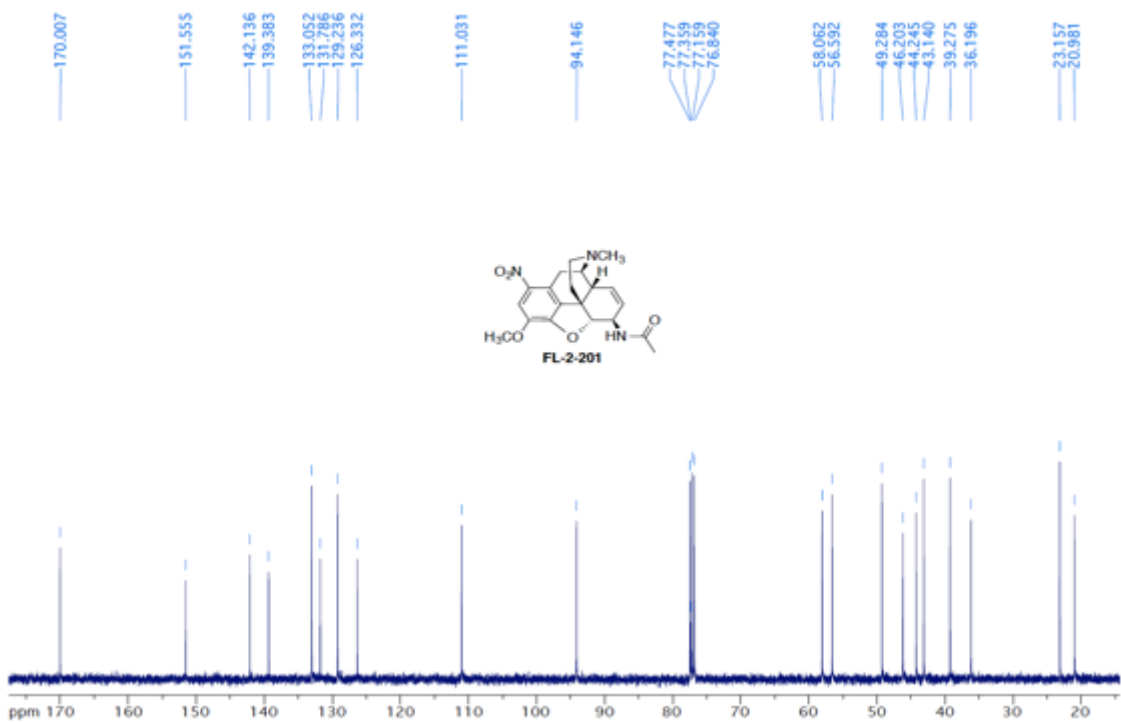

### Compound 17

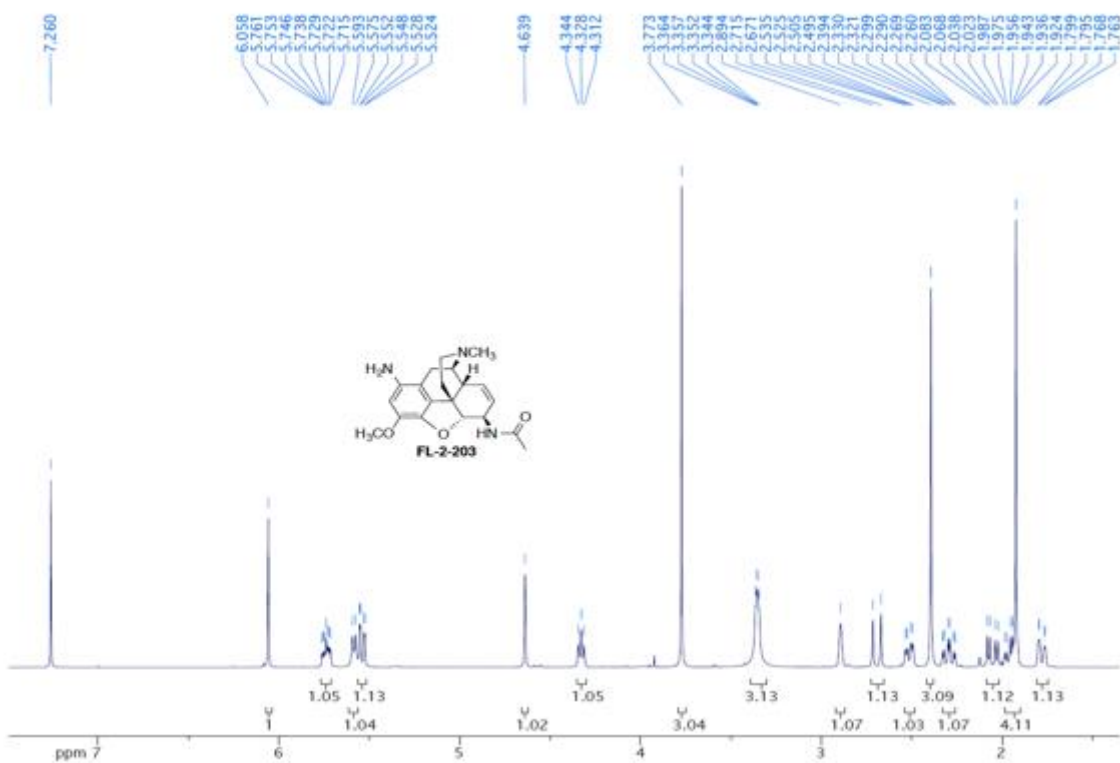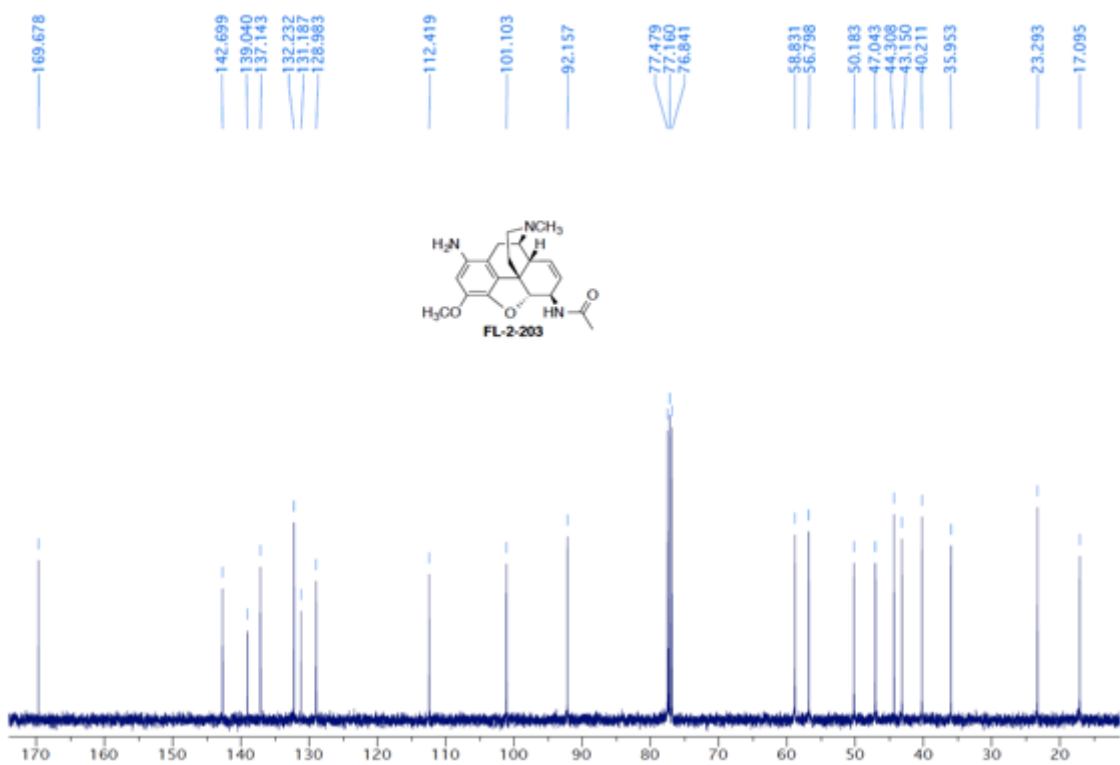

Chemical structure of compound 10 is shown in the top left corner. The  $^1\text{H}$  NMR spectrum (400 MHz,  $\text{CDCl}_3$ ) displays the following peaks and integration values:

| Chemical Shift (ppm)                                                                                                                                                                                                                                                                                                                                                                                                                                                  | Integration                                                                            |
|-----------------------------------------------------------------------------------------------------------------------------------------------------------------------------------------------------------------------------------------------------------------------------------------------------------------------------------------------------------------------------------------------------------------------------------------------------------------------|----------------------------------------------------------------------------------------|
| 6.607, 6.586, 6.516, 6.495, 6.355, 6.335, 5.488, 5.441, 5.416, 5.350, 5.344, 5.327, 5.300, 5.276, 5.250, 5.233, 5.215, 5.198, 5.173, 4.716, 4.711, 4.711, 4.555, 4.548, 4.541, 4.534, 4.527, 4.519, 4.512, 3.757, 3.755, 3.715, 3.307, 3.292, 3.017, 2.970, 2.684, 2.684, 2.677, 2.671, 2.664, 2.540, 2.530, 2.509, 2.499, 2.380, 2.367, 2.345, 2.337, 2.315, 2.306, 2.271, 2.255, 2.224, 2.209, 2.052, 2.039, 2.031, 2.008, 1.988, 1.978, 1.787, 1.783, 1.756, 1.752 | 0.966, 1.05, 0.992, 0.973, 1.03, 1.05, 2.89, 1.09, 1.06, 1.11, 1.02, 1.05, 3.63, 0.977 |



# Compound 20

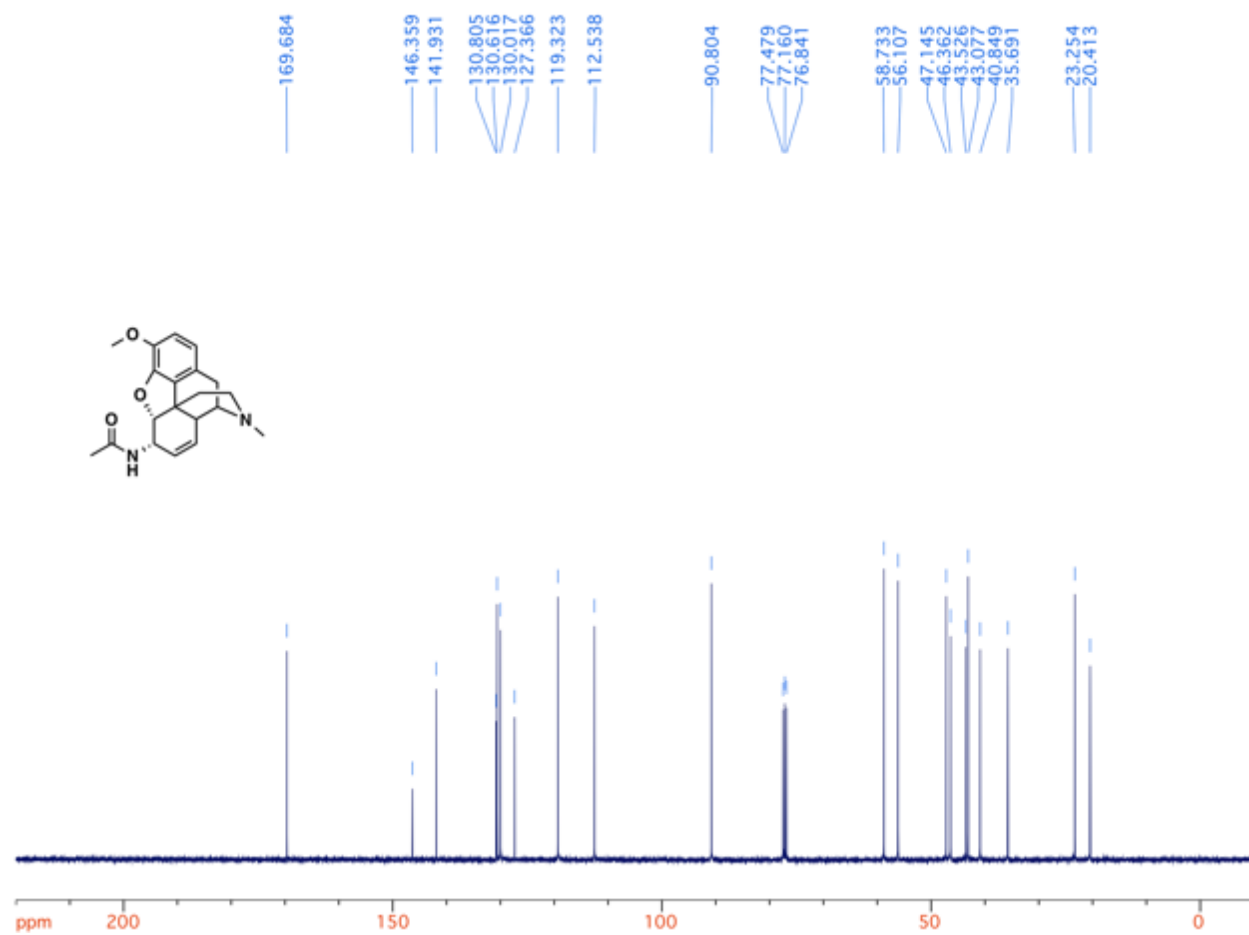

Compound **21**

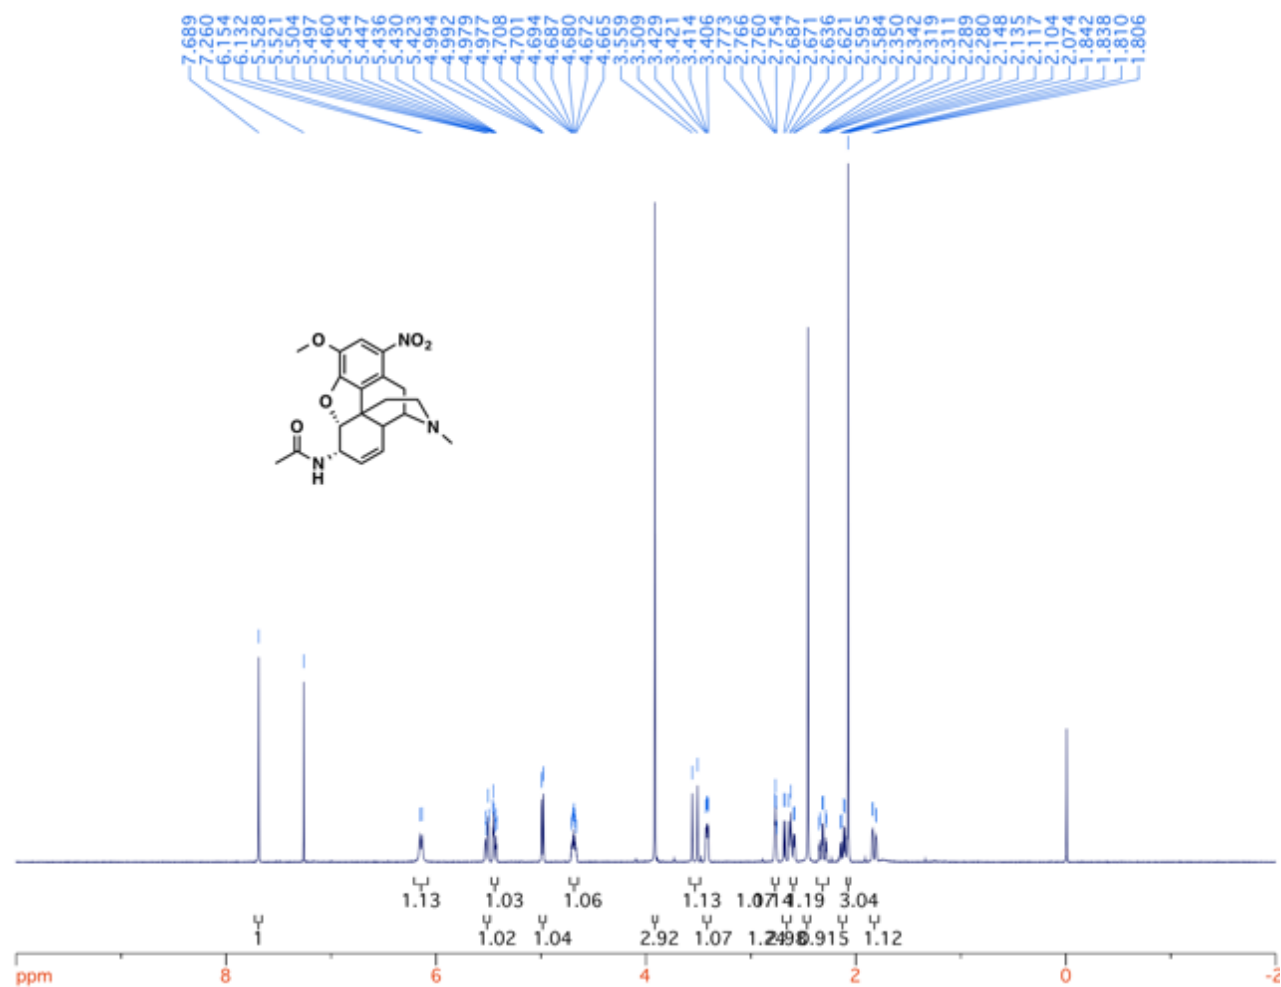

# Compound **21**

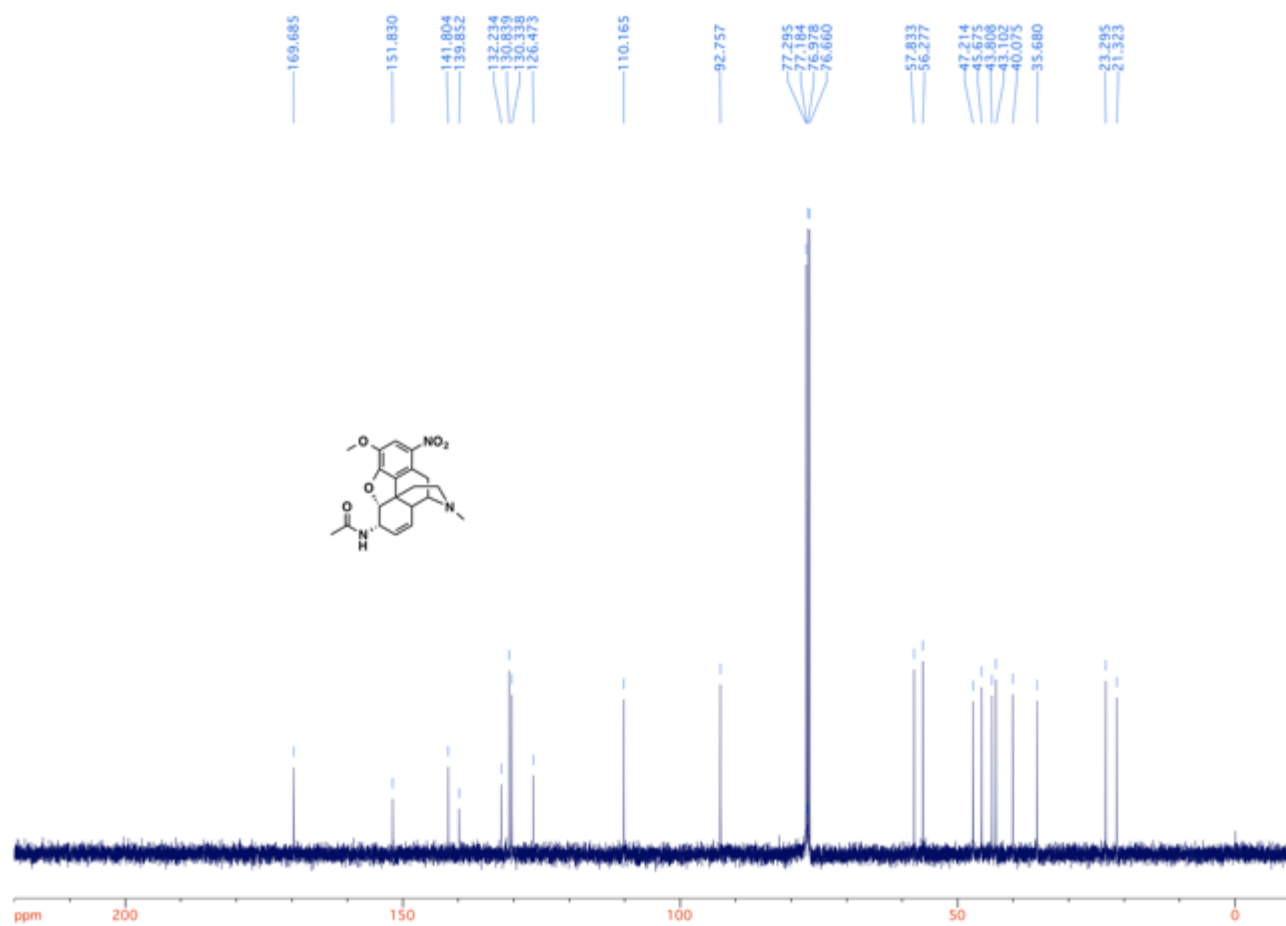

Compound **22**

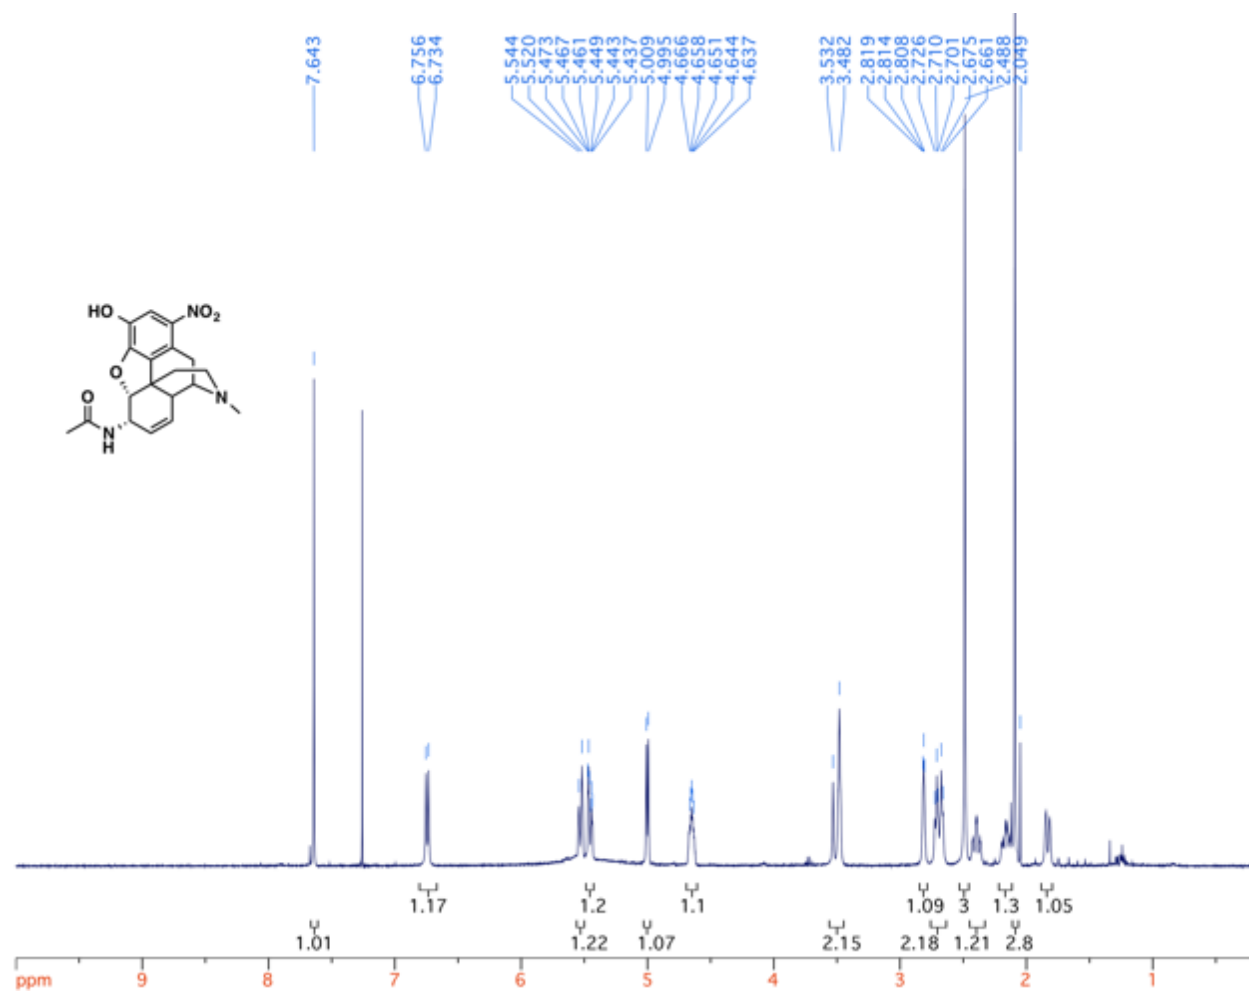

# Compound 22

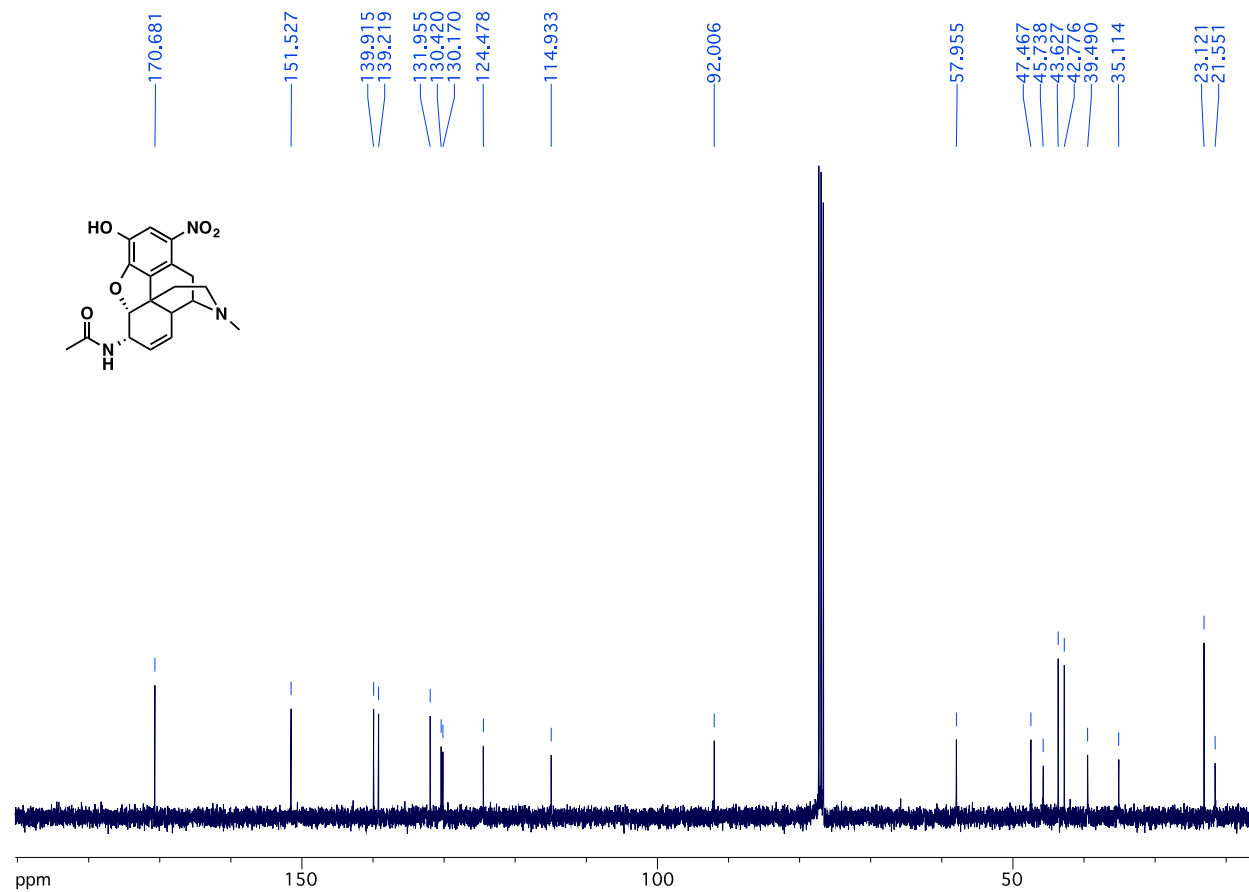

# Compound 23

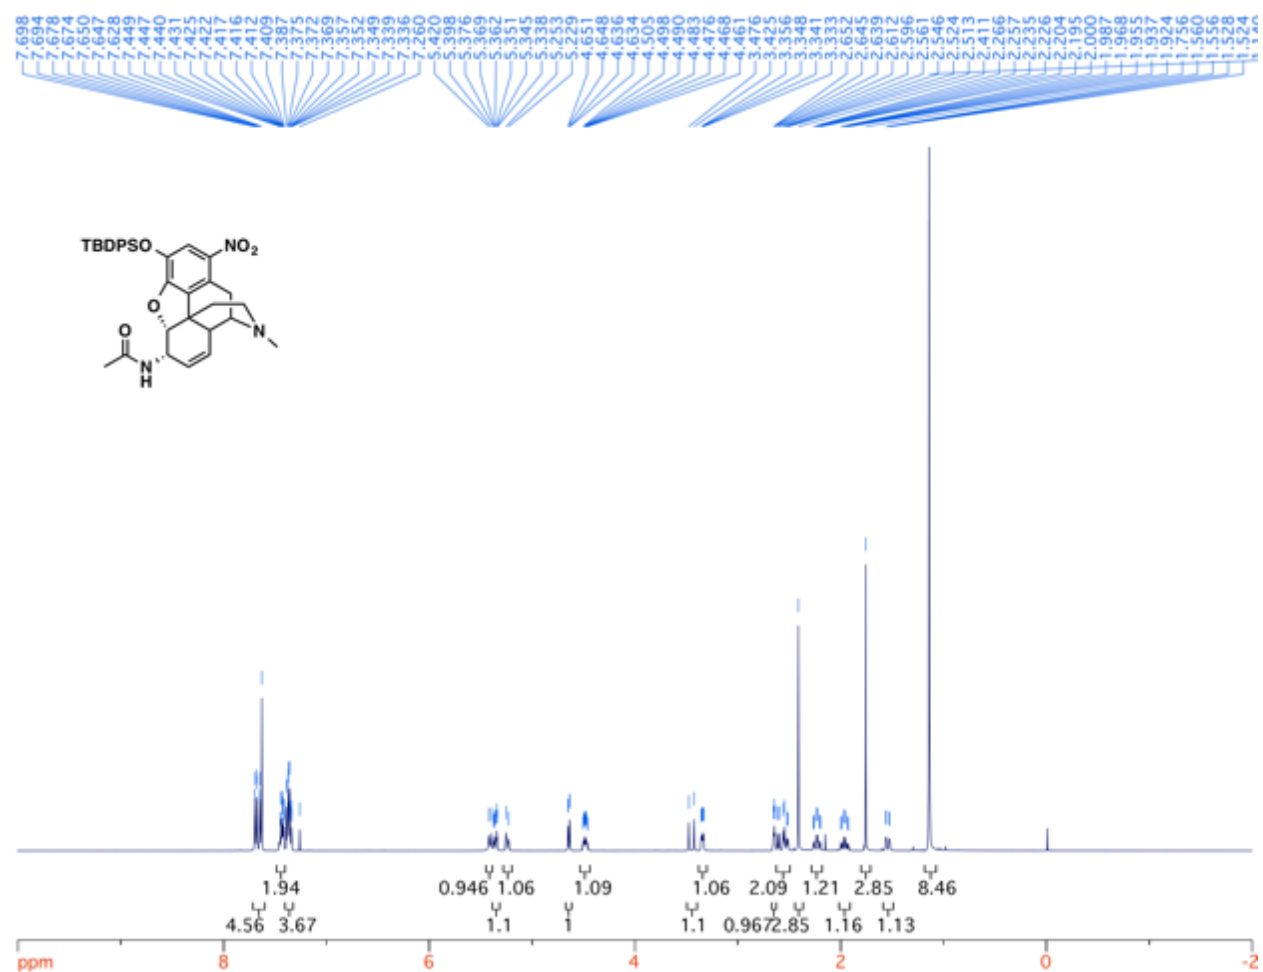

# Compound **23**

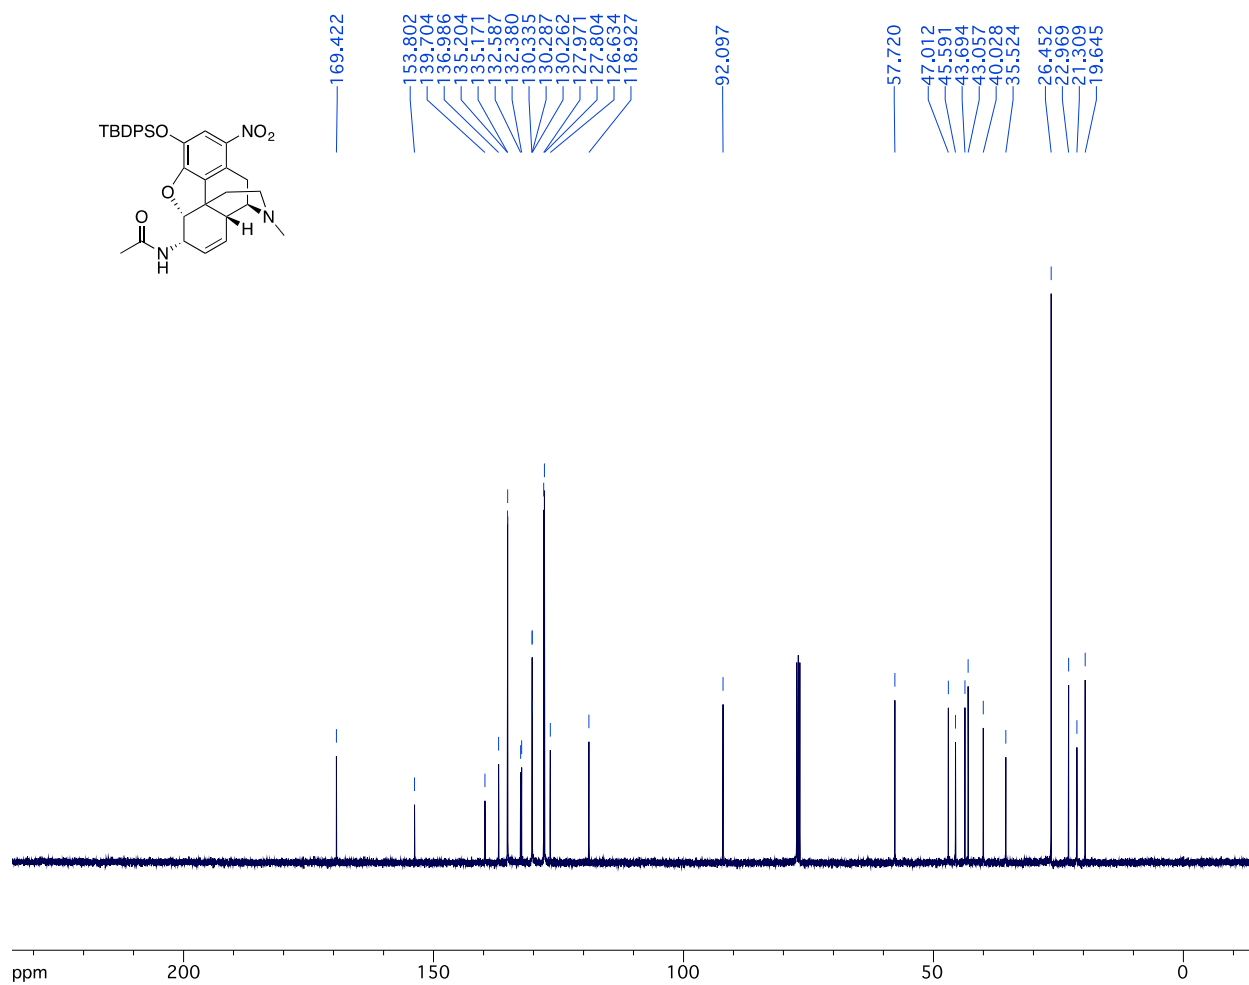

7.7210  
7.7100  
7.6994  
7.6777  
7.6441  
7.6211  
7.5924  
7.5653  
7.5345  
7.5018  
7.4674  
7.4314  
7.3949  
7.3586  
7.3265  
7.2966  
7.2645  
7.2315  
7.1970  
7.1656  
6.9760  
5.6011  
5.5799  
5.5700  
5.5665  
5.5241  
5.5223  
5.5197  
4.5427  
4.5227  
4.4096  
4.3917  
3.7278  
3.6925  
3.6552  
3.6332  
3.6200  
3.6050  
3.5900  
3.5655  
3.5488  
3.5333  
3.5192  
3.4981  
3.4790  
3.4622  
3.4394  
3.4271  
3.4129  
3.3971  
3.3855  
3.3705  
3.3585  
3.3405  
3.3205  
3.3005  
3.2855  
3.2705  
3.2555  
3.2405  
3.2205  
3.2010  
3.1836  
3.1636  
3.1402  
3.1220  
3.1020  
3.0820  
3.0620  
3.0420  
3.0220  
3.0020  
2.9820  
2.9620  
2.9420  
2.9220  
2.9020  
2.8820  
2.8620  
2.8420  
2.8220  
2.8020  
2.7820  
2.7620  
2.7420  
2.7220  
2.7020  
2.6820  
2.6620  
2.6420  
2.6220  
2.6020  
2.5820  
2.5620  
2.5420  
2.5220  
2.5020  
2.4820  
2.4620  
2.4420  
2.4220  
2.4020  
2.3820  
2.3620  
2.3420  
2.3220  
2.3020  
2.2820  
2.2620  
2.2420  
2.2220  
2.2020  
2.1820  
2.1620  
2.1420  
2.1220

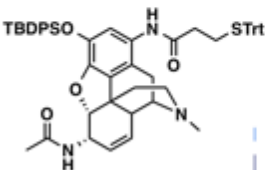



[illegible]

# Compound 26

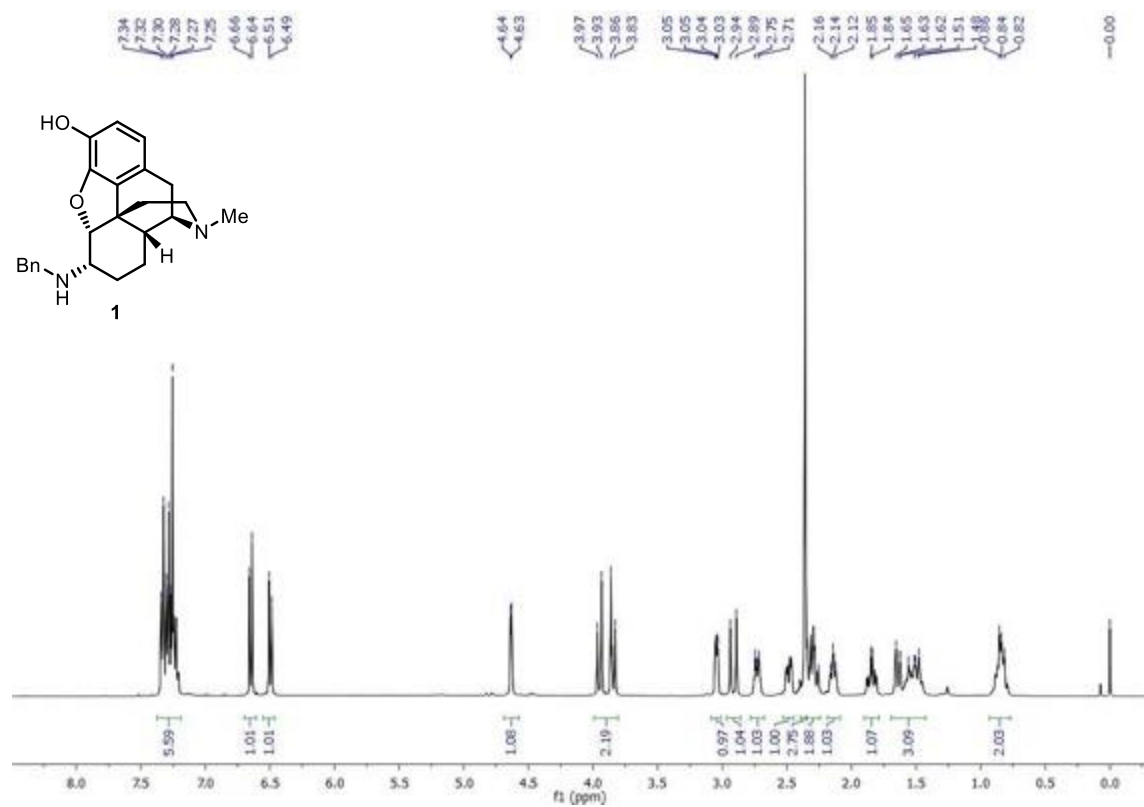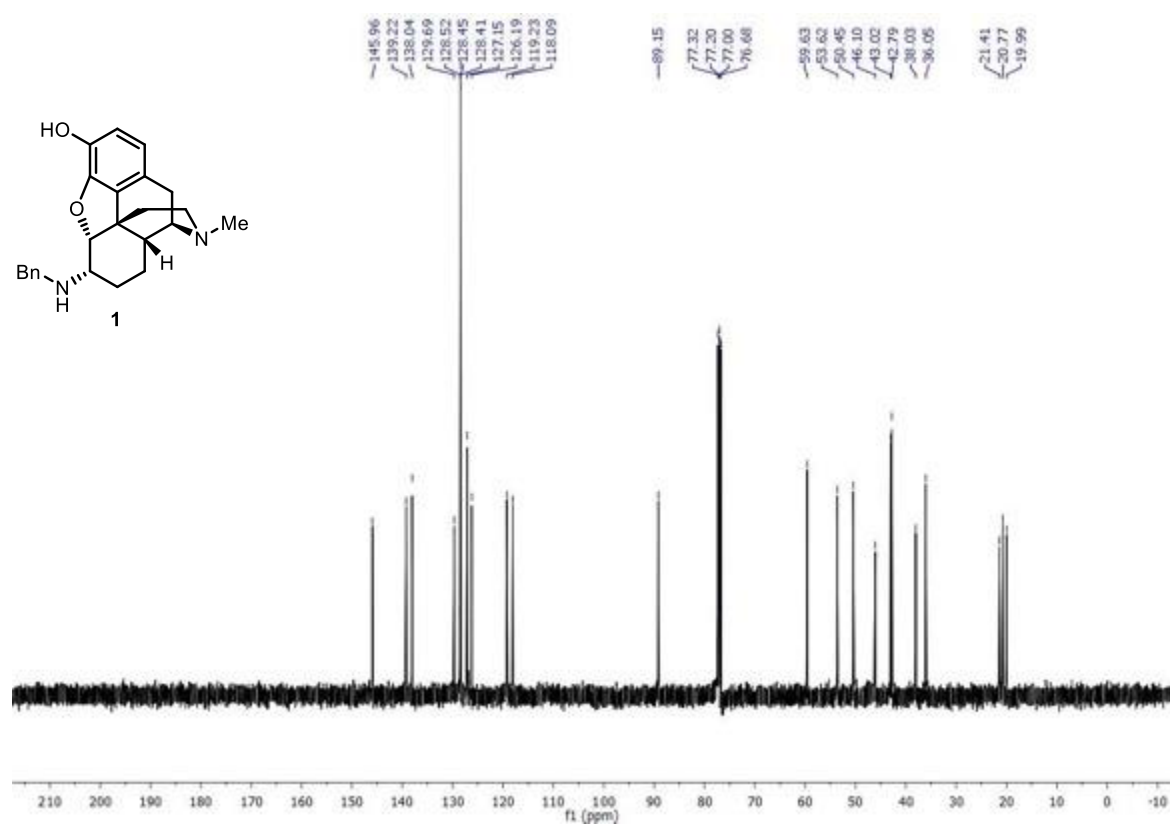

# Compound 29

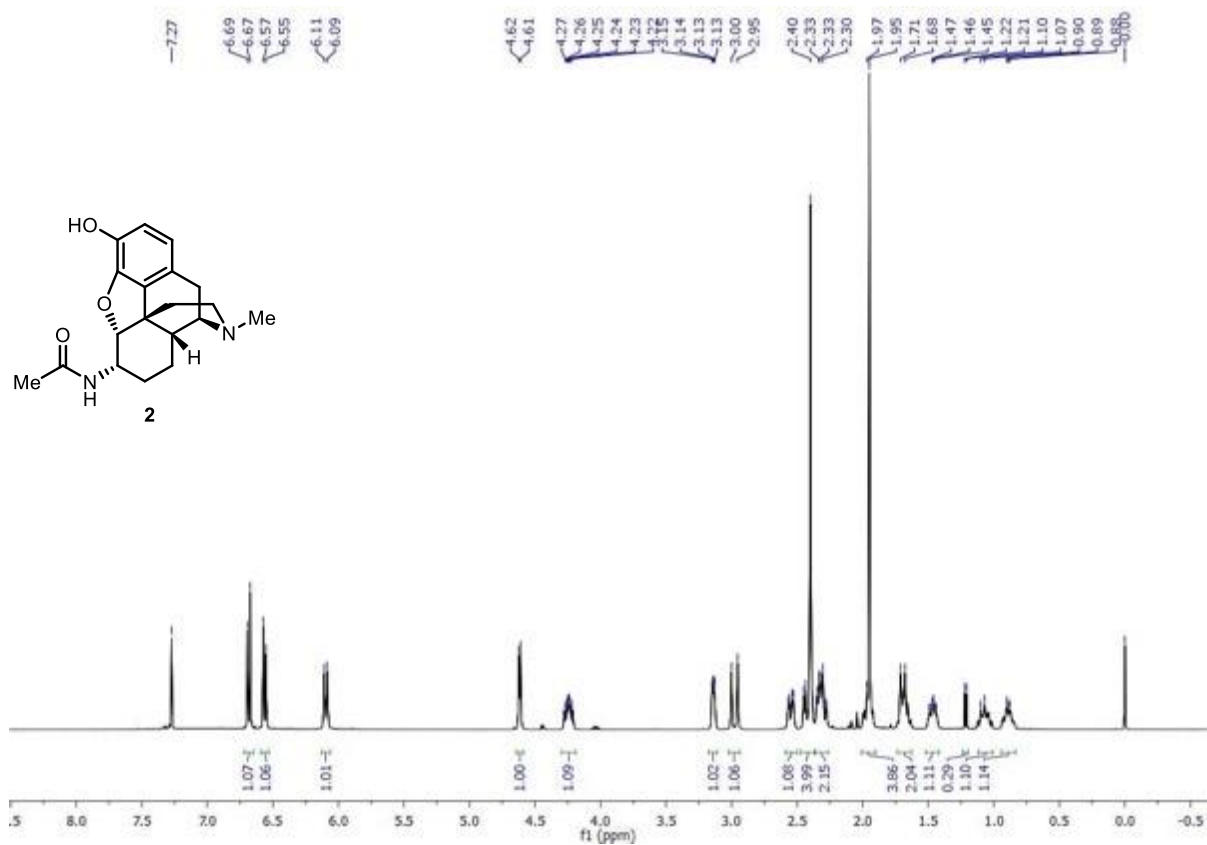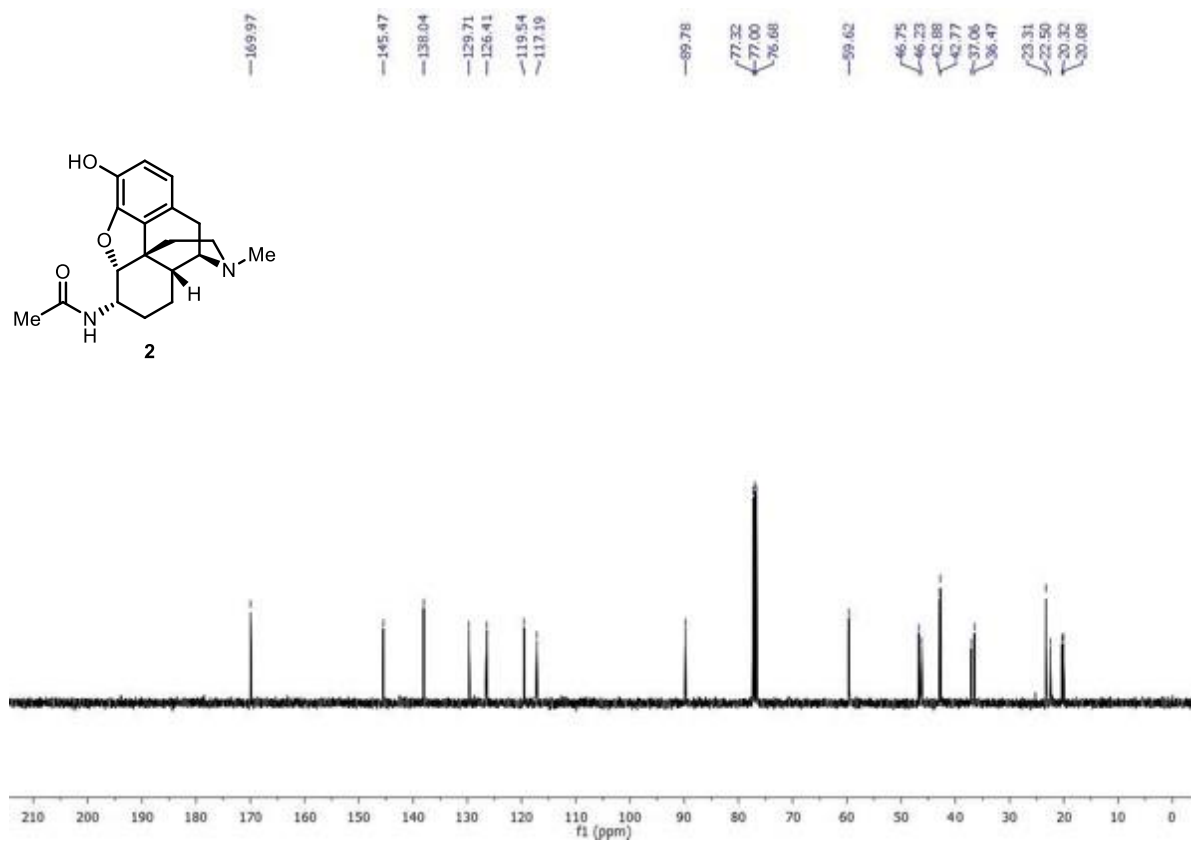

# Compound 30

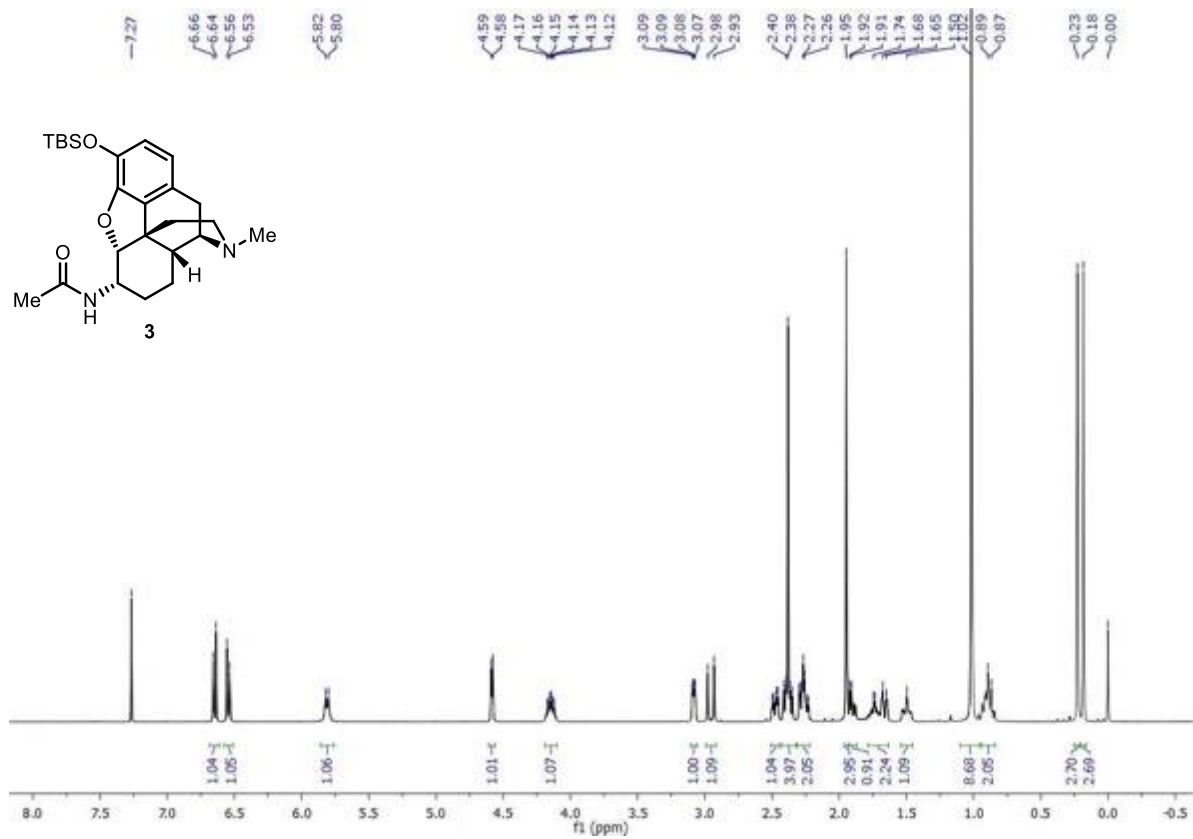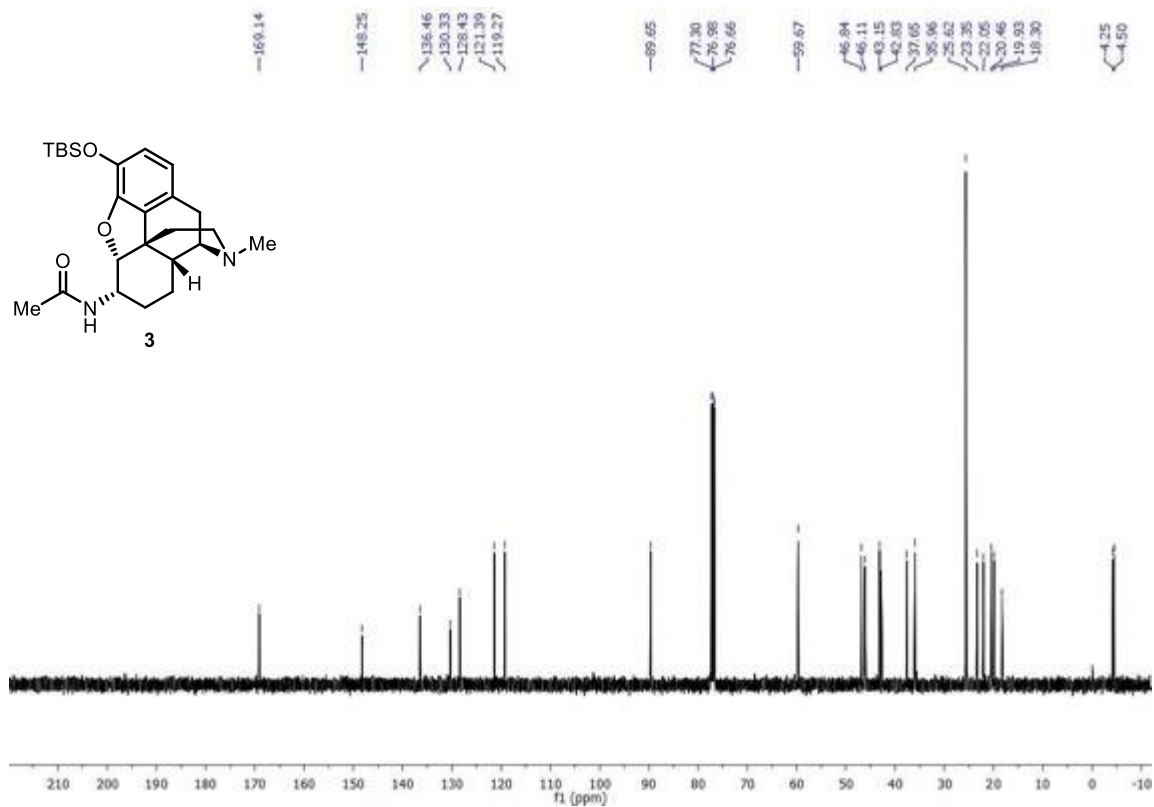

# Compound 31

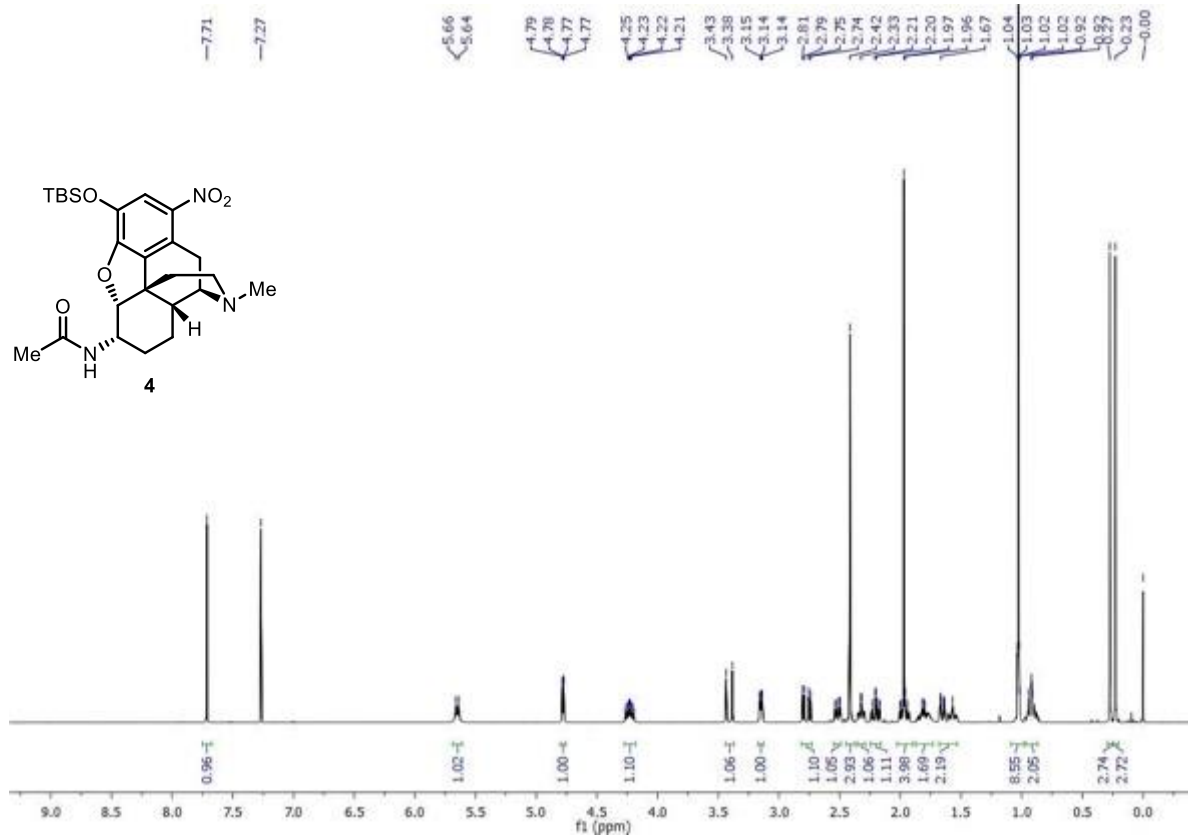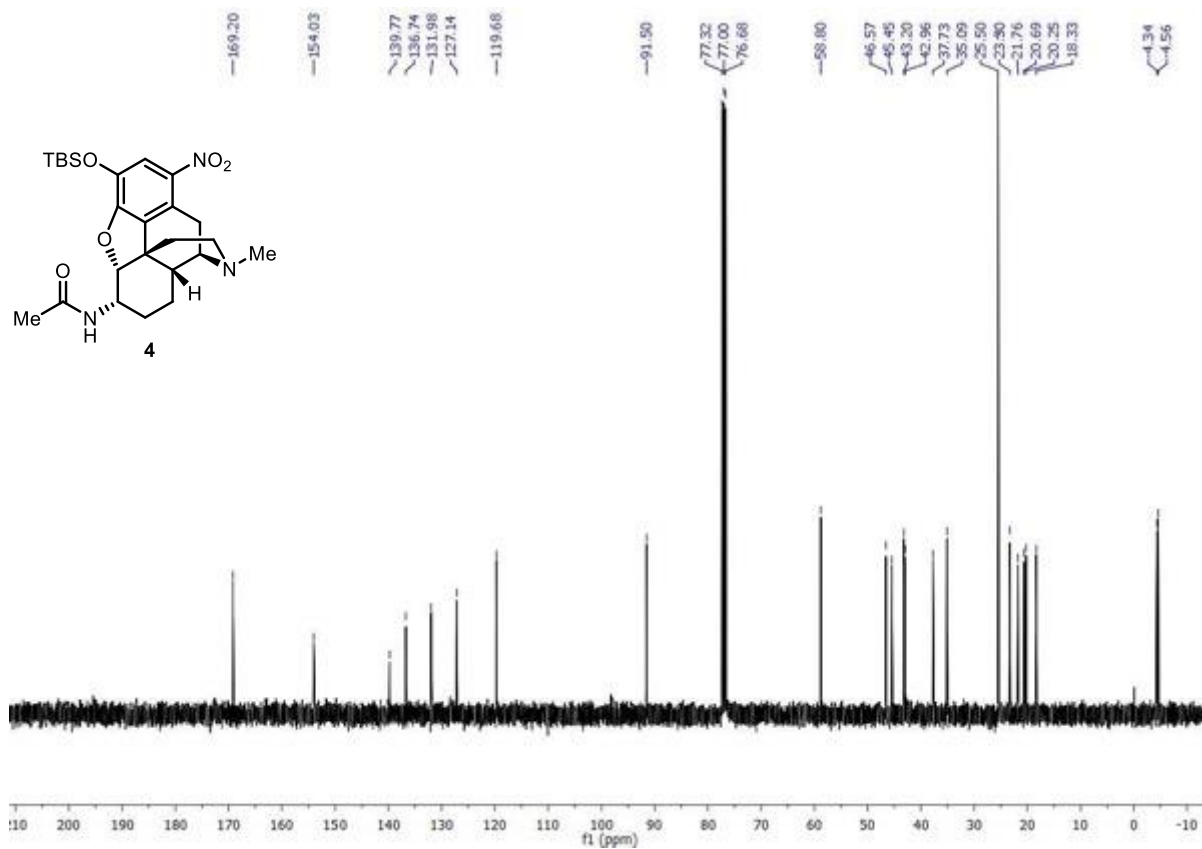

# Compound 32

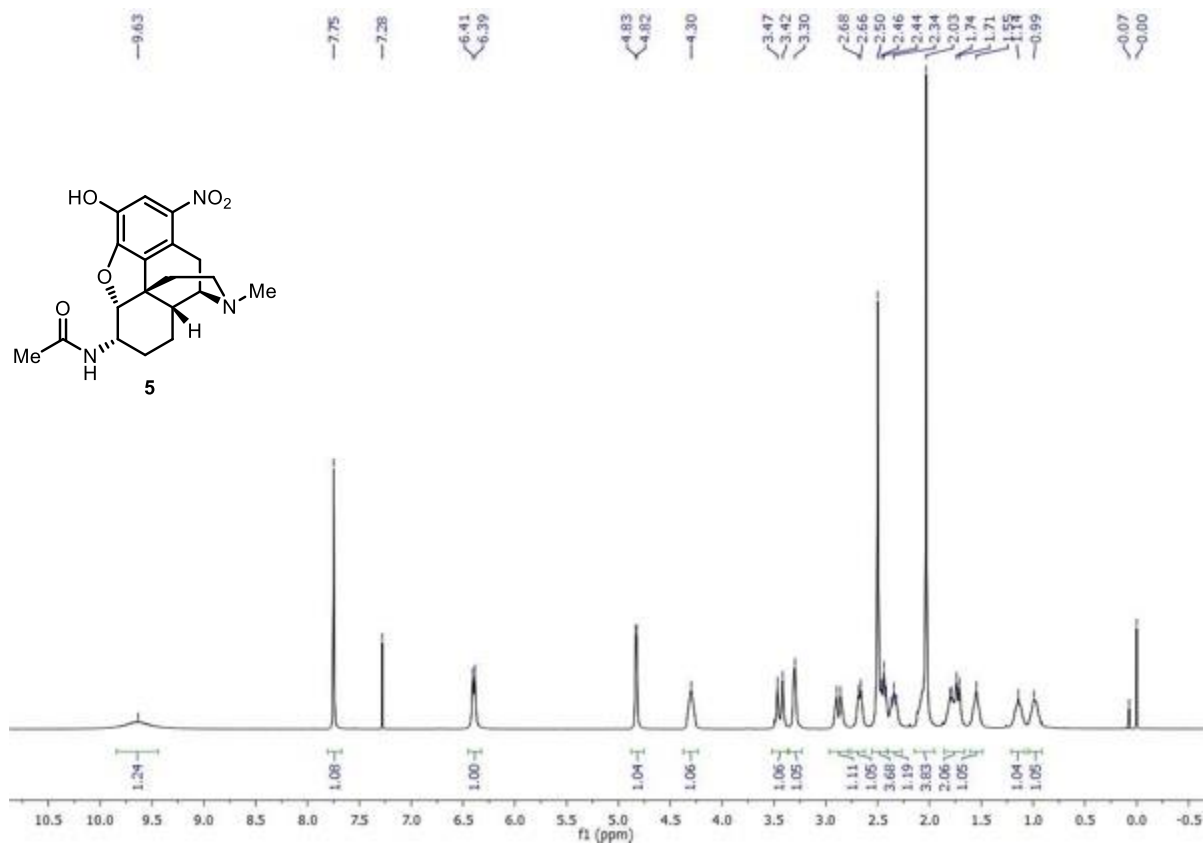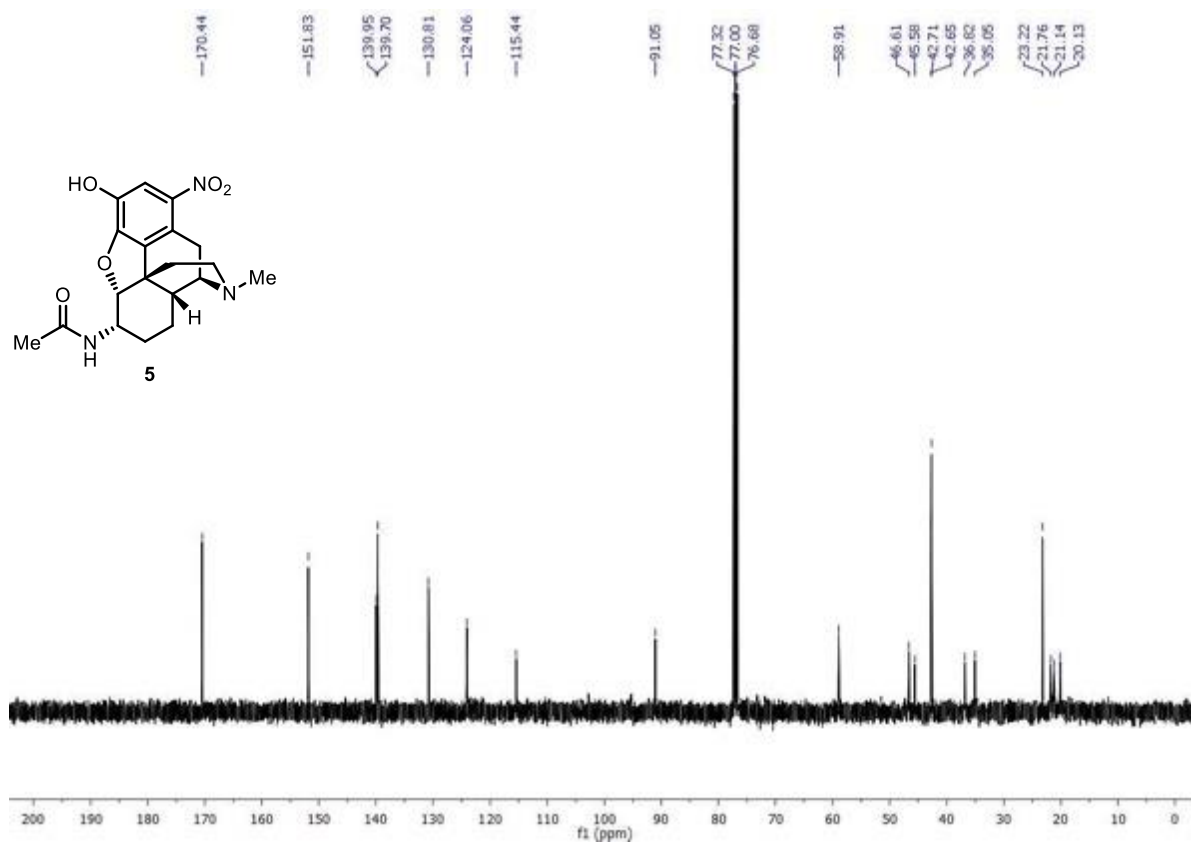

# Compound 34

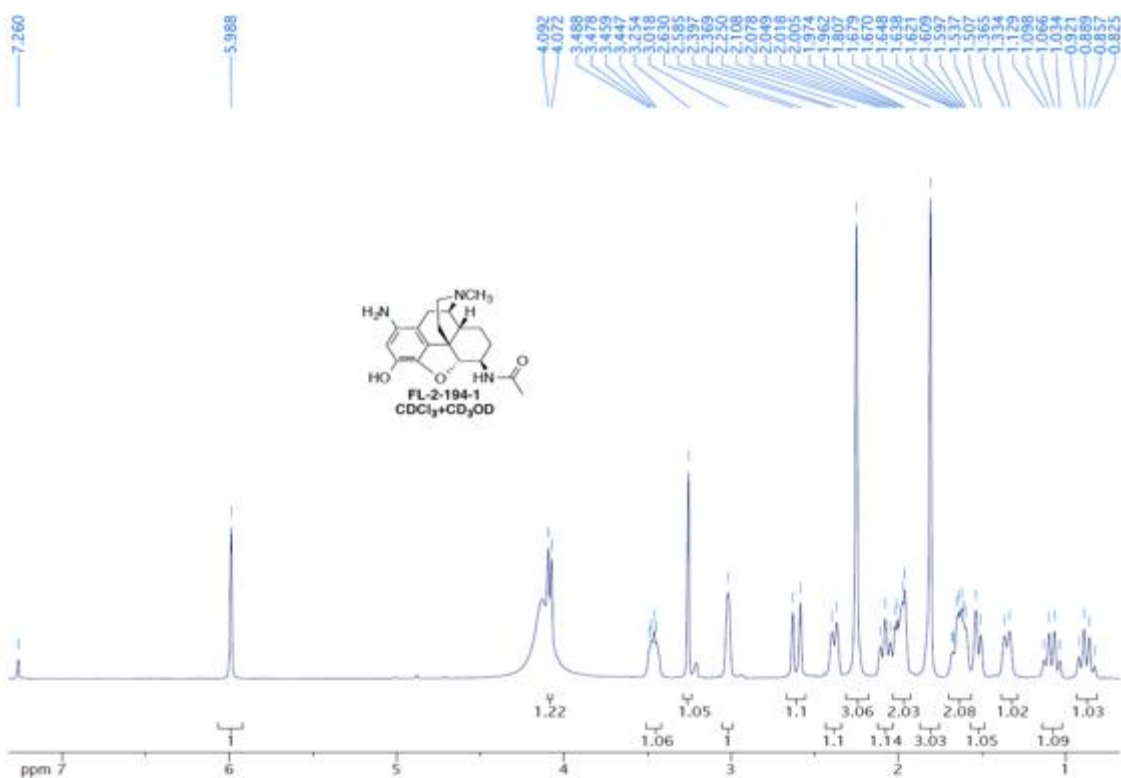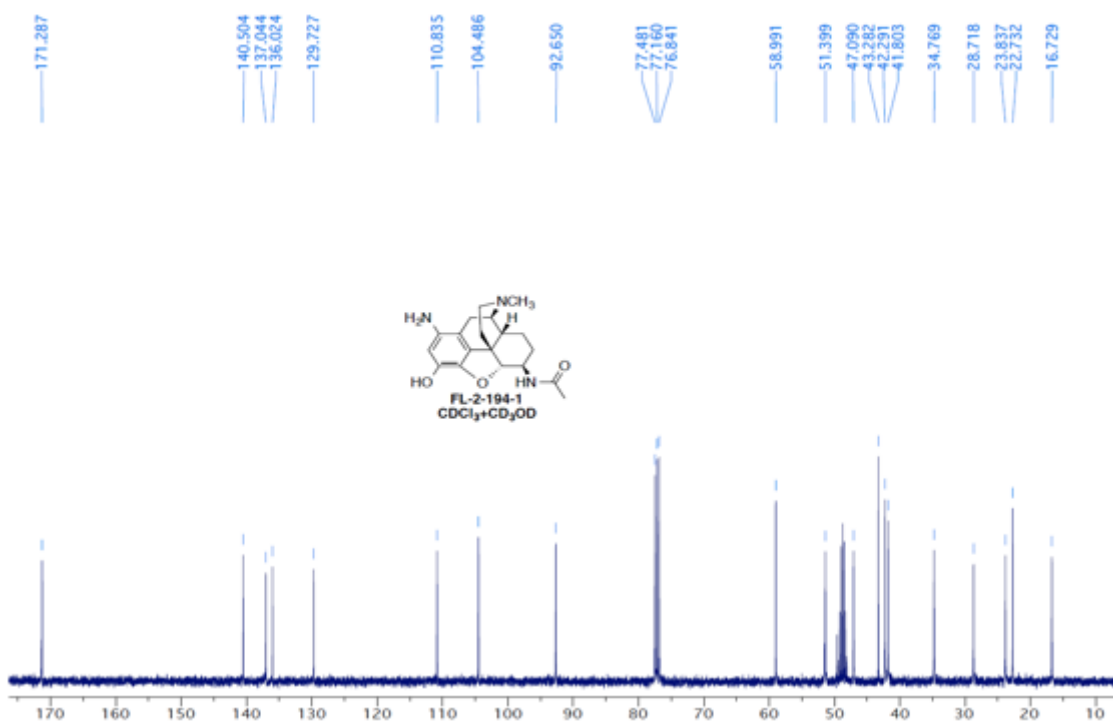

**Table S1.** Crystal data and structure refinement for compound **16**.

|                                   |                                                               |                   |
|-----------------------------------|---------------------------------------------------------------|-------------------|
| Identification code               | knih109                                                       |                   |
| Empirical formula                 | C <sub>20</sub> H <sub>23</sub> N <sub>3</sub> O <sub>5</sub> |                   |
| Formula weight                    | 385.41                                                        |                   |
| Temperature                       | 150(2) K                                                      |                   |
| Wavelength                        | 1.54178 Å                                                     |                   |
| Crystal system                    | Monoclinic                                                    |                   |
| Space group                       | P2 <sub>1</sub>                                               |                   |
| Unit cell dimensions              | a = 7.39130(10) Å                                             | a = 90°.          |
|                                   | b = 9.4942(2) Å                                               | b = 92.8700(10)°. |
|                                   | c = 13.1498(3) Å                                              | g = 90°.          |
| Volume                            | 921.62(3) Å <sup>3</sup>                                      |                   |
| Z                                 | 2                                                             |                   |
| Density (calculated)              | 1.389 Mg/m <sup>3</sup>                                       |                   |
| Absorption coefficient            | 0.836 mm <sup>-1</sup>                                        |                   |
| F(000)                            | 408                                                           |                   |
| Crystal size                      | 0.373 x 0.343 x 0.281 mm <sup>3</sup>                         |                   |
| Theta range for data collection   | 3.365 to 68.217°.                                             |                   |
| Index ranges                      | -8<=h<=8, -9<=k<=11, -15<=l<=15                               |                   |
| Reflections collected             | 5409                                                          |                   |
| Independent reflections           | 2429 [R <sub>int</sub> = 0.0213]                              |                   |
| Completeness to theta = 67.679°   | 94.5 %                                                        |                   |
| Absorption correction             | Semi-empirical from equivalents                               |                   |
| Max. and min. transmission        | 0.7530 and 0.7025                                             |                   |
| Refinement method                 | Full-matrix least-squares on F <sup>2</sup>                   |                   |
| Data / restraints / parameters    | 2429 / 1 / 257                                                |                   |
| Goodness-of-fit on F <sup>2</sup> | 1.234                                                         |                   |
| Final R indices [I>2sigma(I)]     | R <sub>1</sub> = 0.0394, wR <sub>2</sub> = 0.0913             |                   |
| R indices (all data)              | R <sub>1</sub> = 0.0394, wR <sub>2</sub> = 0.0913             |                   |
| Absolute structure parameter      | 0.07(5)                                                       |                   |
| Extinction coefficient            | 0.083(4)                                                      |                   |
| Largest diff. peak and hole       | 0.298 and -0.283 e.Å <sup>-3</sup>                            |                   |



**Table S2.** Atomic coordinates ( $\times 10^4$ ) and equivalent isotropic displacement parameters ( $\text{\AA}^2 \times 10^3$ ) for compound **16**.  $U(\text{eq})$  is defined as one third of the trace of the orthogonalized  $U_{ij}$  tensor.

|       | x       | y        | z        | U(eq) |
|-------|---------|----------|----------|-------|
| C(1)  | 1860(3) | 5256(3)  | 7362(2)  | 25(1) |
| N(1)  | 1851(3) | 3786(2)  | 7034(2)  | 29(1) |
| O(1A) | 2391(3) | 3511(2)  | 6188(2)  | 43(1) |
| O(1B) | 1314(3) | 2876(2)  | 7607(2)  | 43(1) |
| C(2)  | 1147(3) | 5507(3)  | 8320(2)  | 25(1) |
| C(3)  | 1243(3) | 6831(3)  | 8751(2)  | 24(1) |
| O(3)  | 686(2)  | 7201(2)  | 9684(1)  | 30(1) |
| C(3A) | -44(3)  | 6098(3)  | 10286(2) | 35(1) |
| C(4)  | 2049(3) | 7881(3)  | 8189(2)  | 23(1) |
| O(5)  | 2387(2) | 9217(2)  | 8505(1)  | 26(1) |
| C(5)  | 3804(3) | 9744(2)  | 7857(2)  | 25(1) |
| C(6)  | 5710(3) | 9447(3)  | 8401(2)  | 25(1) |
| C(7)  | 6861(3) | 8382(3)  | 7883(2)  | 31(1) |
| C(8)  | 6609(3) | 7989(3)  | 6920(2)  | 32(1) |
| C(9)  | 4412(3) | 7558(3)  | 5391(2)  | 29(1) |
| C(10) | 3617(3) | 6158(3)  | 5798(2)  | 28(1) |
| C(11) | 2657(3) | 6304(3)  | 6784(2)  | 24(1) |
| C(12) | 2664(3) | 7614(3)  | 7237(2)  | 23(1) |
| C(13) | 3453(3) | 8955(3)  | 6845(2)  | 24(1) |
| C(14) | 5103(3) | 8567(3)  | 6242(2)  | 26(1) |
| C(15) | 2059(3) | 9723(3)  | 6138(2)  | 31(1) |
| C(16) | 1562(3) | 8861(3)  | 5190(2)  | 35(1) |
| N(17) | 3190(3) | 8382(3)  | 4700(2)  | 34(1) |
| C(17) | 2754(4) | 7678(4)  | 3734(2)  | 46(1) |
| N(18) | 5561(2) | 9024(2)  | 9454(1)  | 27(1) |
| C(19) | 4918(3) | 9925(3)  | 10134(2) | 28(1) |
| O(19) | 4717(3) | 11182(2) | 9938(2)  | 36(1) |
| C(20) | 4418(4) | 9297(3)  | 11129(2) | 36(1) |

**Table S3.** Bond lengths [Å] and angles [°] for compound **16**.

|                     |            |                     |            |
|---------------------|------------|---------------------|------------|
| C(1)-C(11)          | 1.400(3)   | C(1)-C(2)           | 1.409(3)   |
| C(1)-N(1)           | 1.460(3)   | N(1)-O(1B)          | 1.226(3)   |
| N(1)-O(1A)          | 1.229(3)   | C(2)-C(3)           | 1.380(3)   |
| C(2)-H(2A)          | 0.9500     | C(3)-O(3)           | 1.359(3)   |
| C(3)-C(4)           | 1.393(3)   | O(3)-C(3A)          | 1.434(3)   |
| C(3A)-H(3AA)        | 0.9800     | C(3A)-H(3AB)        | 0.9800     |
| C(3A)-H(3AC)        | 0.9800     | C(4)-O(5)           | 1.355(3)   |
| C(4)-C(12)          | 1.376(3)   | O(5)-C(5)           | 1.471(2)   |
| C(5)-C(13)          | 1.538(3)   | C(5)-C(6)           | 1.573(3)   |
| C(5)-H(5A)          | 1.0000     | C(6)-N(18)          | 1.451(3)   |
| C(6)-C(7)           | 1.506(3)   | C(6)-H(6A)          | 1.0000     |
| C(7)-C(8)           | 1.324(4)   | C(7)-H(7A)          | 0.9500     |
| C(8)-C(14)          | 1.495(3)   | C(8)-H(8A)          | 0.9500     |
| C(9)-N(17)          | 1.473(3)   | C(9)-C(14)          | 1.540(3)   |
| C(9)-C(10)          | 1.559(4)   | C(9)-H(9A)          | 1.0000     |
| C(10)-C(11)         | 1.515(3)   | C(10)-H(10A)        | 0.9900     |
| C(10)-H(10B)        | 0.9900     | C(11)-C(12)         | 1.379(3)   |
| C(12)-C(13)         | 1.503(3)   | C(13)-C(14)         | 1.533(3)   |
| C(13)-C(15)         | 1.538(3)   | C(14)-H(14A)        | 1.0000     |
| C(15)-C(16)         | 1.521(4)   | C(15)-H(15A)        | 0.9900     |
| C(15)-H(15B)        | 0.9900     | C(16)-N(17)         | 1.466(3)   |
| C(16)-H(16A)        | 0.9900     | C(16)-H(16B)        | 0.9900     |
| N(17)-C(17)         | 1.457(3)   | C(17)-H(17A)        | 0.9800     |
| C(17)-H(17B)        | 0.9800     | C(17)-H(17C)        | 0.9800     |
| N(18)-C(19)         | 1.342(3)   | N(18)-H(18A)        | 0.8800     |
| C(19)-O(19)         | 1.229(3)   | C(19)-C(20)         | 1.501(3)   |
| C(20)-H(20A)        | 0.9800     | C(20)-H(20B)        | 0.9800     |
| C(20)-H(20C)        | 0.9800     |                     |            |
| C(11)-C(1)-C(2)     | 123.4(2)   | C(11)-C(1)-N(1)     | 120.93(19) |
| C(2)-C(1)-N(1)      | 115.5(2)   | O(1B)-N(1)-O(1A)    | 122.4(2)   |
| O(1B)-N(1)-C(1)     | 119.28(19) | O(1A)-N(1)-C(1)     | 118.29(19) |
| C(3)-C(2)-C(1)      | 120.6(2)   | C(3)-C(2)-H(2A)     | 119.7      |
| C(1)-C(2)-H(2A)     | 119.7      | O(3)-C(3)-C(2)      | 126.5(2)   |
| O(3)-C(3)-C(4)      | 116.8(2)   | C(2)-C(3)-C(4)      | 116.57(19) |
| C(3)-O(3)-C(3A)     | 116.62(19) | O(3)-C(3A)-H(3AA)   | 109.5      |
| O(3)-C(3A)-H(3AB)   | 109.5      | H(3AA)-C(3A)-H(3AB) | 109.5      |
| O(3)-C(3A)-H(3AC)   | 109.5      | H(3AA)-C(3A)-H(3AC) | 109.5      |
| H(3AB)-C(3A)-H(3AC) | 109.5      | O(5)-C(4)-C(12)     | 112.8(2)   |
| O(5)-C(4)-C(3)      | 125.73(19) | C(12)-C(4)-C(3)     | 121.4(2)   |
| C(4)-O(5)-C(5)      | 105.43(16) | O(5)-C(5)-C(13)     | 103.97(17) |
| O(5)-C(5)-C(6)      | 108.86(17) | C(13)-C(5)-C(6)     | 114.48(18) |
| O(5)-C(5)-H(5A)     | 109.       | C(13)-C(5)-H(5A)    | 109.8      |
| C(6)-C(5)-H(5A)     | 109.8      | N(18)-C(6)-C(7)     | 108.5(2)   |

**Table S3.** (continued).

|                     |            |                     |            |
|---------------------|------------|---------------------|------------|
| N(18)-C(6)-C(5)     | 112.01(17) | C(7)-C(6)-C(5)      | 115.3(2)   |
| N(18)-C(6)-H(6A)    | 106.8      | C(7)-C(6)-H(6A)     | 106.8      |
| C(5)-C(6)-H(6A)     | 106.8      | C(8)-C(7)-C(6)      | 124.5(2)   |
| C(8)-C(7)-H(7A)     | 117.8      | C(6)-C(7)-H(7A)     | 117.8      |
| C(7)-C(8)-C(14)     | 122.2(2)   | C(7)-C(8)-H(8A)     | 118.9      |
| C(14)-C(8)-H(8A)    | 118.9      | N(17)-C(9)-C(14)    | 106.8(2)   |
| N(17)-C(9)-C(10)    | 115.7(2)   | C(14)-C(9)-C(10)    | 113.48(18) |
| N(17)-C(9)-H(9A)    | 106.8      | C(14)-C(9)-H(9A)    | 106.8      |
| C(10)-C(9)-H(9A)    | 106.8      | C(11)-C(10)-C(9)    | 114.6(2)   |
| C(11)-C(10)-H(10A)  | 108.6      | C(9)-C(10)-H(10A)   | 108.6      |
| C(11)-C(10)-H(10B)  | 108.6      | C(9)-C(10)-H(10B)   | 108.6      |
| H(10A)-C(10)-H(10B) | 107.6      | C(12)-C(11)-C(1)    | 113.48(19) |
| C(12)-C(11)-C(10)   | 117.4(2)   | C(1)-C(11)-C(10)    | 128.9(2)   |
| C(4)-C(12)-C(11)    | 124.4(2)   | C(4)-C(12)-C(13)    | 107.9(2)   |
| C(11)-C(12)-C(13)   | 127.49(18) | C(12)-C(13)-C(14)   | 107.88(19) |
| C(12)-C(13)-C(15)   | 110.46(19) | C(14)-C(13)-C(15)   | 109.12(18) |
| C(12)-C(13)-C(5)    | 99.64(17)  | C(14)-C(13)-C(5)    | 117.44(19) |
| C(15)-C(13)-C(5)    | 111.77(19) | C(8)-C(14)-C(13)    | 111.53(18) |
| C(8)-C(14)-C(9)     | 114.5(2)   | C(13)-C(14)-C(9)    | 106.35(18) |
| C(8)-C(14)-H(14A)   | 108.1      | C(13)-C(14)-H(14A)  | 108.1      |
| C(9)-C(14)-H(14A)   | 108.1      | C(16)-C(15)-C(13)   | 111.6(2)   |
| C(16)-C(15)-H(15A)  | 109.3      | C(13)-C(15)-H(15A)  | 109.3      |
| C(16)-C(15)-H(15B)  | 109.3      | C(13)-C(15)-H(15B)  | 109.3      |
| H(15A)-C(15)-H(15B) | 108.0      | N(17)-C(16)-C(15)   | 110.9(2)   |
| N(17)-C(16)-H(16A)  | 109.5      | C(15)-C(16)-H(16A)  | 109.5      |
| N(17)-C(16)-H(16B)  | 109.5      | C(15)-C(16)-H(16B)  | 109.5      |
| H(16A)-C(16)-H(16B) | 108.0      | C(17)-N(17)-C(16)   | 112.0(2)   |
| C(17)-N(17)-C(9)    | 113.4(2)   | C(16)-N(17)-C(9)    | 112.66(18) |
| N(17)-C(17)-H(17A)  | 109.5      | N(17)-C(17)-H(17B)  | 109.5      |
| H(17A)-C(17)-H(17B) | 109.5      | N(17)-C(17)-H(17C)  | 109.5      |
| H(17A)-C(17)-H(17C) | 109.5      | H(17B)-C(17)-H(17C) | 109.5      |
| C(19)-N(18)-C(6)    | 120.4(2)   | C(19)-N(18)-H(18A)  | 119.8      |
| C(6)-N(18)-H(18A)   | 119.8      | O(19)-C(19)-N(18)   | 121.5(2)   |
| O(19)-C(19)-C(20)   | 122.5(2)   | N(18)-C(19)-C(20)   | 116.1(2)   |
| C(19)-C(20)-H(20A)  | 109.5      | C(19)-C(20)-H(20B)  | 109.5      |
| H(20A)-C(20)-H(20B) | 109.5      | C(19)-C(20)-H(20C)  | 109.5      |
| H(20A)-C(20)-H(20C) | 109.5      | H(20B)-C(20)-H(20C) | 109.5      |

---

**Table S4.** Anisotropic displacement parameters ( $\text{\AA}^2 \times 10^3$ ) for compound **16**. The anisotropic displacement factor exponent takes the form:  $-2p^2[h^2a^*2U^{11} + \dots + 2hka^*b^*U^{12}]$

|       | U <sup>11</sup> | U <sup>22</sup> | U <sup>33</sup> | U <sup>23</sup> | U <sup>13</sup> | U <sup>12</sup> |
|-------|-----------------|-----------------|-----------------|-----------------|-----------------|-----------------|
| C(1)  | 26(1)           | 20(1)           | 28(1)           | -1(1)           | 3(1)            | 2(1)            |
| N(1)  | 32(1)           | 22(1)           | 33(1)           | -1(1)           | 6(1)            | 0(1)            |
| O(1A) | 61(1)           | 28(1)           | 41(1)           | -11(1)          | 23(1)           | -3(1)           |
| O(1B) | 68(1)           | 21(1)           | 43(1)           | 3(1)            | 15(1)           | -6(1)           |
| C(2)  | 24(1)           | 25(1)           | 27(1)           | 3(1)            | 5(1)            | 0(1)            |
| C(3)  | 21(1)           | 28(1)           | 25(1)           | -1(1)           | 8(1)            | 1(1)            |
| O(3)  | 37(1)           | 29(1)           | 26(1)           | -1(1)           | 15(1)           | -2(1)           |
| C(3A) | 40(1)           | 35(2)           | 29(1)           | 4(1)            | 16(1)           | -2(1)           |
| C(4)  | 20(1)           | 24(1)           | 25(1)           | 0(1)            | 3(1)            | 2(1)            |
| O(5)  | 28(1)           | 22(1)           | 28(1)           | -4(1)           | 10(1)           | -1(1)           |
| C(5)  | 30(1)           | 19(1)           | 27(1)           | 1(1)            | 8(1)            | -1(1)           |
| C(6)  | 30(1)           | 21(1)           | 26(1)           | 1(1)            | 4(1)            | -3(1)           |
| C(7)  | 25(1)           | 36(2)           | 32(1)           | 2(1)            | 4(1)            | 3(1)            |
| C(8)  | 26(1)           | 37(1)           | 32(1)           | -1(1)           | 10(1)           | 5(1)            |
| C(9)  | 34(1)           | 31(1)           | 24(1)           | 1(1)            | 9(1)            | 1(1)            |
| C(10) | 34(1)           | 26(1)           | 25(1)           | -2(1)           | 10(1)           | 1(1)            |
| C(11) | 26(1)           | 23(1)           | 23(1)           | 0(1)            | 4(1)            | 2(1)            |
| C(12) | 22(1)           | 21(1)           | 25(1)           | 3(1)            | 4(1)            | 2(1)            |
| C(13) | 27(1)           | 20(1)           | 25(1)           | 2(1)            | 7(1)            | 1(1)            |
| C(14) | 29(1)           | 27(1)           | 24(1)           | 1(1)            | 9(1)            | -2(1)           |
| C(15) | 36(1)           | 25(1)           | 31(1)           | 5(1)            | 2(1)            | 4(1)            |
| C(16) | 37(1)           | 37(2)           | 31(1)           | 5(1)            | -1(1)           | 3(1)            |
| N(17) | 42(1)           | 38(1)           | 23(1)           | 2(1)            | 3(1)            | -1(1)           |
| C(17) | 57(2)           | 55(2)           | 25(1)           | -1(1)           | 2(1)            | -5(1)           |
| N(18) | 34(1)           | 22(1)           | 25(1)           | 1(1)            | 3(1)            | 1(1)            |
| C(19) | 28(1)           | 28(1)           | 28(1)           | -4(1)           | -2(1)           | -2(1)           |
| O(19) | 48(1)           | 21(1)           | 39(1)           | -5(1)           | 2(1)            | -1(1)           |
| C(20) | 42(1)           | 40(2)           | 26(1)           | -2(1)           | 0(1)            | -1(1)           |

**Table S5.** Hydrogen coordinates ( $\times 10^4$ ) and isotropic displacement parameters ( $\text{\AA}^2 \times 10^3$ ) for compound **16**.

|        | x     | y     | z     | U(eq) |
|--------|-------|-------|-------|-------|
| H(2A)  | 597   | 4759  | 8671  | 30    |
| H(3AA) | -318  | 6469  | 10956 | 52    |
| H(3AB) | 844   | 5334  | 10369 | 52    |
| H(3AC) | -1156 | 5735  | 9943  | 52    |
| H(5A)  | 3647  | 10780 | 7745  | 30    |
| H(6A)  | 6392  | 10357 | 8410  | 30    |
| H(7A)  | 7835  | 7964  | 8273  | 37    |
| H(8A)  | 7410  | 7319  | 6651  | 38    |
| H(9A)  | 5484  | 7297  | 4996  | 35    |
| H(10A) | 2752  | 5770  | 5271  | 34    |
| H(10B) | 4615  | 5470  | 5902  | 34    |
| H(14A) | 5549  | 9444  | 5915  | 31    |
| H(15A) | 953   | 9910  | 6510  | 37    |
| H(15B) | 2564  | 10641 | 5934  | 37    |
| H(16A) | 834   | 8034  | 5379  | 42    |
| H(16B) | 815   | 9441  | 4704  | 42    |
| H(17A) | 2176  | 8350  | 3254  | 68    |
| H(17B) | 1924  | 6894  | 3843  | 68    |
| H(17C) | 3868  | 7318  | 3455  | 68    |
| H(18A) | 5896  | 8172  | 9648  | 32    |
| H(20A) | 4465  | 10028 | 11656 | 54    |
| H(20B) | 5273  | 8543  | 11324 | 54    |
| H(20C) | 3189  | 8909  | 11058 | 54    |

**Table S6.** Torsion angles [°] for compound **16**.

|                         |             |                         |             |
|-------------------------|-------------|-------------------------|-------------|
| C(11)-C(1)-N(1)-O(1B)   | 172.4(2)    | C(2)-C(1)-N(1)-O(1B)    | -2.9(3)     |
| C(11)-C(1)-N(1)-O(1A)   | -7.5(3)     | C(2)-C(1)-N(1)-O(1A)    | 177.2(2)    |
| C(11)-C(1)-C(2)-C(3)    | -1.4(3)     | N(1)-C(1)-C(2)-C(3)     | 173.8(2)    |
| C(1)-C(2)-C(3)-O(3)     | -176.8(2)   | C(1)-C(2)-C(3)-C(4)     | 0.7(3)      |
| C(2)-C(3)-O(3)-C(3A)    | 1.2(3)      | C(4)-C(3)-O(3)-C(3A)    | -176.40(19) |
| O(3)-C(3)-C(4)-O(5)     | 2.7(3)      | C(2)-C(3)-C(4)-O(5)     | -175.1(2)   |
| O(3)-C(3)-C(4)-C(12)    | 179.77(19)  | C(2)-C(3)-C(4)-C(12)    | 2.0(3)      |
| C(12)-C(4)-O(5)-C(5)    | -18.1(2)    | C(3)-C(4)-O(5)-C(5)     | 159.3(2)    |
| C(4)-O(5)-C(5)-C(13)    | 30.4(2)     | C(4)-O(5)-C(5)-C(6)     | -92.1(2)    |
| O(5)-C(5)-C(6)-N(18)    | -12.0(3)    | C(13)-C(5)-C(6)-N(18)   | -127.9(2)   |
| O(5)-C(5)-C(6)-C(7)     | 112.7(2)    | C(13)-C(5)-C(6)-C(7)    | -3.1(3)     |
| N(18)-C(6)-C(7)-C(8)    | 145.1(2)    | C(5)-C(6)-C(7)-C(8)     | 18.5(4)     |
| C(6)-C(7)-C(8)-C(14)    | -0.8(4)     | N(17)-C(9)-C(10)-C(11)  | -90.0(2)    |
| C(14)-C(9)-C(10)-C(11)  | 34.0(3)     | C(2)-C(1)-C(11)-C(12)   | -0.6(3)     |
| N(1)-C(1)-C(11)-C(12)   | -175.6(2)   | C(2)-C(1)-C(11)-C(10)   | 174.0(2)    |
| N(1)-C(1)-C(11)-C(10)   | -0.9(4)     | C(9)-C(10)-C(11)-C(12)  | -3.1(3)     |
| C(9)-C(10)-C(11)-C(1)   | -177.5(2)   | O(5)-C(4)-C(12)-C(11)   | 173.1(2)    |
| C(3)-C(4)-C(12)-C(11)   | -4.3(3)     | O(5)-C(4)-C(12)-C(13)   | -2.4(3)     |
| C(3)-C(4)-C(12)-C(13)   | -179.87(18) | C(1)-C(11)-C(12)-C(4)   | 3.4(3)      |
| C(10)-C(11)-C(12)-C(4)  | -171.8(2)   | C(1)-C(11)-C(12)-C(13)  | 178.1(2)    |
| C(10)-C(11)-C(12)-C(13) | 2.8(3)      | C(4)-C(12)-C(13)-C(14)  | 143.53(19)  |
| C(11)-C(12)-C(13)-C(14) | -31.8(3)    | C(4)-C(12)-C(13)-C(15)  | -97.3(2)    |
| C(11)-C(12)-C(13)-C(15) | 87.4(3)     | C(4)-C(12)-C(13)-C(5)   | 20.4(2)     |
| C(11)-C(12)-C(13)-C(5)  | -154.9(2)   | O(5)-C(5)-C(13)-C(12)   | -30.1(2)    |
| C(6)-C(5)-C(13)-C(12)   | 88.5(2)     | O(5)-C(5)-C(13)-C(14)   | -146.2(2)   |
| C(6)-C(5)-C(13)-C(14)   | -27.5(3)    | O(5)-C(5)-C(13)-C(15)   | 86.6(2)     |
| C(6)-C(5)-C(13)-C(15)   | -154.74(19) | C(7)-C(8)-C(14)-C(13)   | -30.3(3)    |
| C(7)-C(8)-C(14)-C(9)    | -151.1(2)   | C(12)-C(13)-C(14)-C(8)  | -67.6(3)    |
| C(15)-C(13)-C(14)-C(8)  | 172.4(2)    | C(5)-C(13)-C(14)-C(8)   | 43.9(3)     |
| C(12)-C(13)-C(14)-C(9)  | 58.0(2)     | C(15)-C(13)-C(14)-C(9)  | -62.1(2)    |
| C(5)-C(13)-C(14)-C(9)   | 169.42(19)  | N(17)-C(9)-C(14)-C(8)   | -169.98(17) |
| C(10)-C(9)-C(14)-C(8)   | 61.3(3)     | N(17)-C(9)-C(14)-C(13)  | 66.4(2)     |
| C(10)-C(9)-C(14)-C(13)  | -62.4(2)    | C(12)-C(13)-C(15)-C(16) | -63.8(2)    |
| C(14)-C(13)-C(15)-C(16) | 54.7(3)     | C(5)-C(13)-C(15)-C(16)  | -173.73(19) |
| C(13)-C(15)-C(16)-N(17) | -50.4(3)    | C(15)-C(16)-N(17)-C(17) | -174.1(2)   |
| C(15)-C(16)-N(17)-C(9)  | 56.8(3)     | C(14)-C(9)-N(17)-C(17)  | 166.5(2)    |
| C(10)-C(9)-N(17)-C(17)  | -66.1(3)    | C(14)-C(9)-N(17)-C(16)  | -65.0(3)    |
| C(10)-C(9)-N(17)-C(16)  | 62.4(3)     | C(7)-C(6)-N(18)-C(19)   | 166.7(2)    |
| C(5)-C(6)-N(18)-C(19)   | -64.8(3)    | C(6)-N(18)-C(19)-O(19)  | -12.0(3)    |
| C(6)-N(18)-C(19)-C(20)  | 166.4(2)    |                         |             |

**Table S7.** Hydrogen bonds for compound **16** [Å and °].

| D-H...A                | d(D-H) | d(H...A) | d(D...A) | <(DHA) |
|------------------------|--------|----------|----------|--------|
| C(3A)-H(3AA)...O(1B)#1 | 0.98   | 2.46     | 3.417(3) | 166.2  |
| C(5)-H(5A)...O(1B)#2   | 1.00   | 2.63     | 3.504(3) | 145.5  |
| C(9)-H(9A)...O(1A)#3   | 1.00   | 2.54     | 3.348(3) | 137.3  |
| N(18)-H(18A)...O(19)#4 | 0.88   | 2.02     | 2.825(3) | 150.8  |

Symmetry transformations used to generate equivalent atoms:

#1 -x,y+1/2,-z+2   #2 x,y+1,z   #3 -x+1,y+1/2,-z+1

#4 -x+1,y-1/2,-z+2

## Structures of Naloxone and Naltrexone

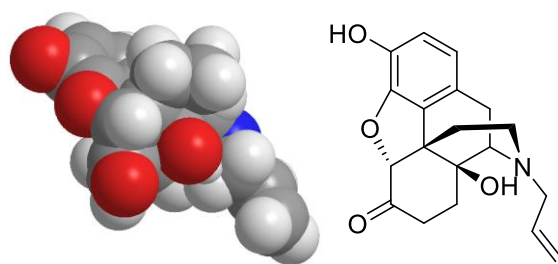

Naloxone

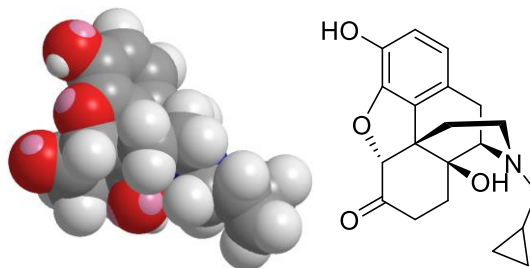

Naltrexone

3D models of the haptens and target drugs. Structures were constructed and geometry optimized using the built-in MM2 method in ChemDraw 18.1. Structures were presented in a similar orientation as in Fig. 6 (main text) to facilitate comparison.
